# Supplementary material for: Integrative analysis of epigenetic and transcriptional interrelations identifies histotype-specific biomarkers in early-stage ovarian carcinoma
Source: Springer Nature journal article supplement (doi:10.1186/s13048-025-01676-5), 2025-05-19
Supplement: MOESM1 [file 13048_2025_1676_MOESM1_ESM.pdf]

## Supplementary Information (SI)

### Article title

Integrative analysis of epigenetic and transcriptional interrelations identifies histotype-specific biomarkers in early-stage ovarian carcinoma

### Journal

*Journal of Ovarian Research*

### Authors

Hugo Swenson, Ella Ittner, Lucas Werner, Elisabeth Werner Rönnerman, Claudia Mateoiu, Anikó Kovács, Pernilla Dahm-Kähler, Ghassan M. Saed, Szilárd Nemes, Per Karlsson, Toshima Z. Parris, and Khalil Helou

### Corresponding author

Hugo Swenson, [hugo.swenson@gu.se](mailto:hugo.swenson@gu.se)

**Figure 1** PCA plot of E-MTAB-1814 before and after removal of samples showing aberrant expression patterns

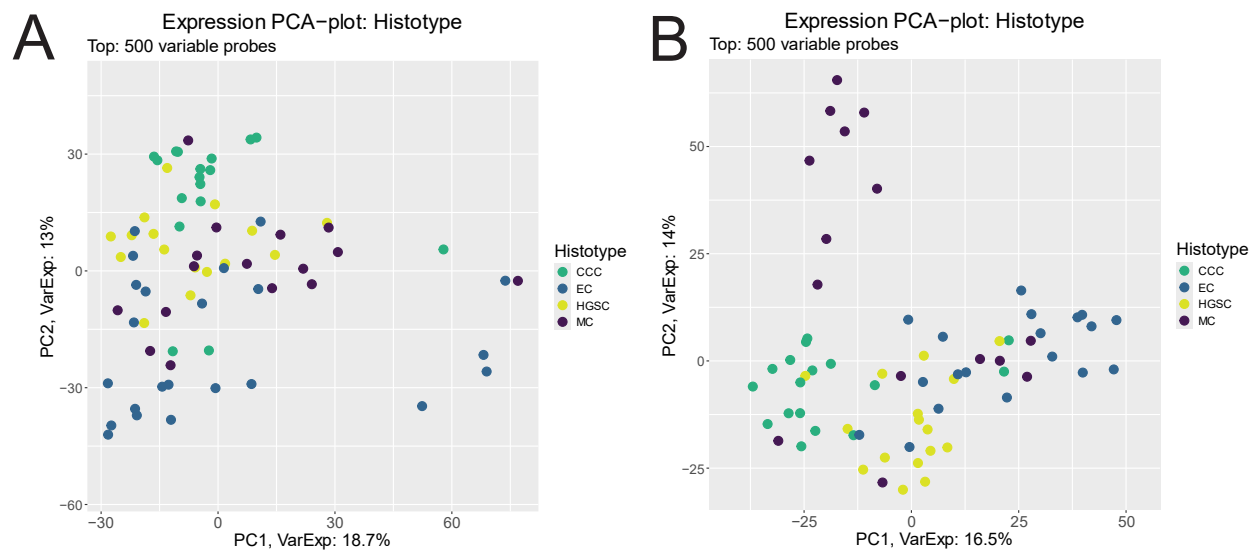

A: PCA plot of E-MTAB-1814 before removal of samples showing aberrant expression patterns (right side of plot)

B: PCA plot of E-MTAB-1814 after removal of samples showing aberrant expression patterns CCC: Clear cell carcinoma, EC: Endometroid carcinoma, HGSC: High-grade serous carcinoma, MC: Mucinous carcinoma

**Table 1** 5-year survival rates with respect to stage and histotype

| Survival (years) | CCC  | EC   | HGSC | MC   |
|------------------|------|------|------|------|
| <b>Stage I</b>   | n=11 | n=14 | n=25 | n=6  |
| 1                | 1    | 1    | 0.96 | 1    |
| 2                | 0.91 | 1    | 0.96 | 0.67 |
| 3                | 0.91 | 0.93 | 0.84 | 0.67 |
| 4                | 0.91 | 0.93 | 0.68 | 0.67 |
| 5                | 0.82 | 0.64 | 0.64 | 0.67 |
| <b>Stage II</b>  | n=2  | n=7  | n=20 | n=1  |
| 1                | 0.5  | 1    | 1    | 1    |
| 2                | 0.5  | 0.86 | 0.95 | 1    |
| 3                | 0.5  | 0.86 | 0.85 | 0    |
| 4                | 0.5  | 0.86 | 0.6  | 0    |
| 5                | 0.5  | 0.71 | 0.5  | 0    |

CCC: Clear cell carcinoma, EC: Endometroid carcinoma, HGSC: High-grade serous carcinoma, MC: Mucinous carcinoma

**Table 2** The number of differentially expressed genes between the OC histotypes in the training cohort

| Comparison group | Total | Upregulated | Downregulated |
|------------------|-------|-------------|---------------|
| EC – CCC         | 733   | 328         | 405           |
| HGSC – CCC       | 1314  | 616         | 698           |
| MC – CCC         | 797   | 390         | 407           |
| CCC – EC         | 731   | 406         | 325           |
| HGSC – EC        | 130   | 32          | 98            |
| MC – EC          | 148   | 119         | 29            |
| CCC – HGSC       | 1309  | 698         | 611           |
| EC – HGSC        | 119   | 100         | 19            |
| MC – HGSC        | 745   | 445         | 300           |
| CCC – MC         | 826   | 442         | 384           |
| EC – MC          | 162   | 43          | 119           |
| HGSC – MC        | 772   | 327         | 445           |

*Upregulated*: ( $\log_2FC > 1.0$ , Benjamini-Hochberg  $< 0.05$ ), *Downregulated*: ( $\log_2FC < -1.0$ , Benjamini-Hochberg  $< 0.05$ ), CCC: Clear cell carcinoma, EC: Endometroid carcinoma, HGSC: High-grade serous carcinoma, MC: Mucinous carcinoma, HSG: Histotype specific gene (classified as significantly differentially expressed gene in 3/3 possible histotype comparisons for a histotype of interest used as reference in comparisons)

**Figure 2** Venn diagram of DEGs in histotype comparisons in the training cohort

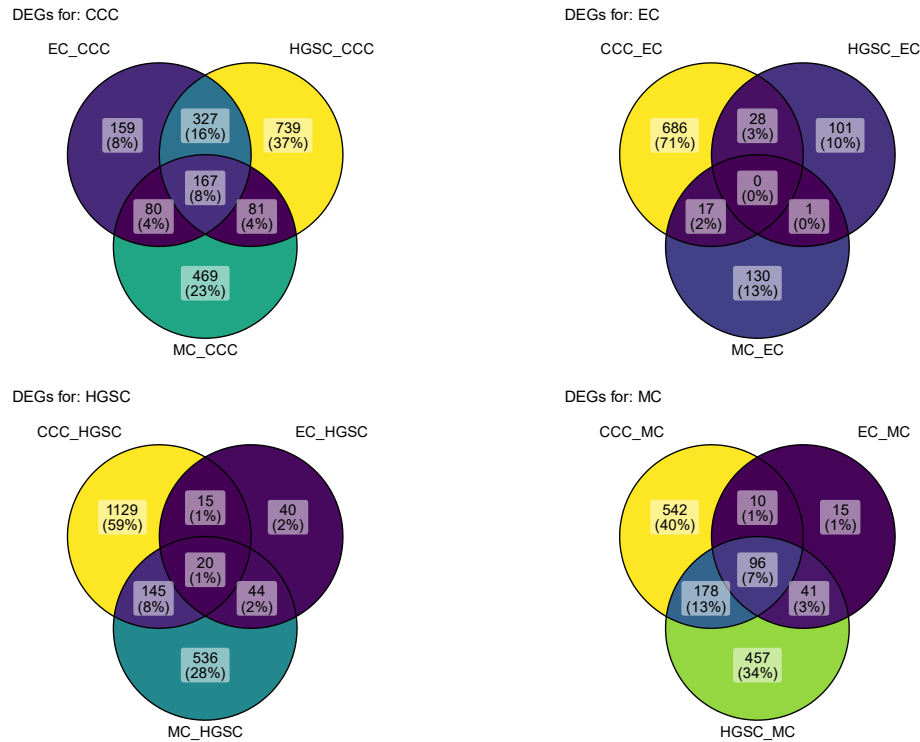

Venn-diagram of DEG-results for histotype comparisons in training cohort. *DEG*: Differentially expressed gene, *CCC*: Clear Cell Carcinoma, *EC*: Endometrioid Carcinoma, *HGSC*: High Grade Serous Carcinoma, *MC*: Mucinous Carcinoma. Plots created in r-package “ggVennDiagram”

**Table 3** The number of differentially expressed HSGs for each histotype in the training cohort

| Histotype | Total | Upregulated | Downregulated |
|-----------|-------|-------------|---------------|
| CCC       | 167   | 144         | 23            |
| EC        | 0     | 0           | 0             |
| HGSC      | 20    | 4           | 16            |
| MC        | 96    | 86          | 10            |

*Upregulated*: ( $\log_2FC > 1.0$ , Benjamini-Hochberg  $< 0.05$ ), *Downregulated*: ( $\log_2FC < -1.0$ , Benjamini-Hochberg  $< 0.05$ ), *CCC*: Clear cell carcinoma, *EC*: Endometrioid carcinoma, *HGSC*: High-grade serous carcinoma, *MC*: Mucinous carcinoma, *HSG*: Histotype specific gene (classified as significantly differentially expressed gene in 3/3 possible histotype comparisons for a histotype of interest used as reference in comparisons)

**Figure 3** Most variable HSGs in the training cohort

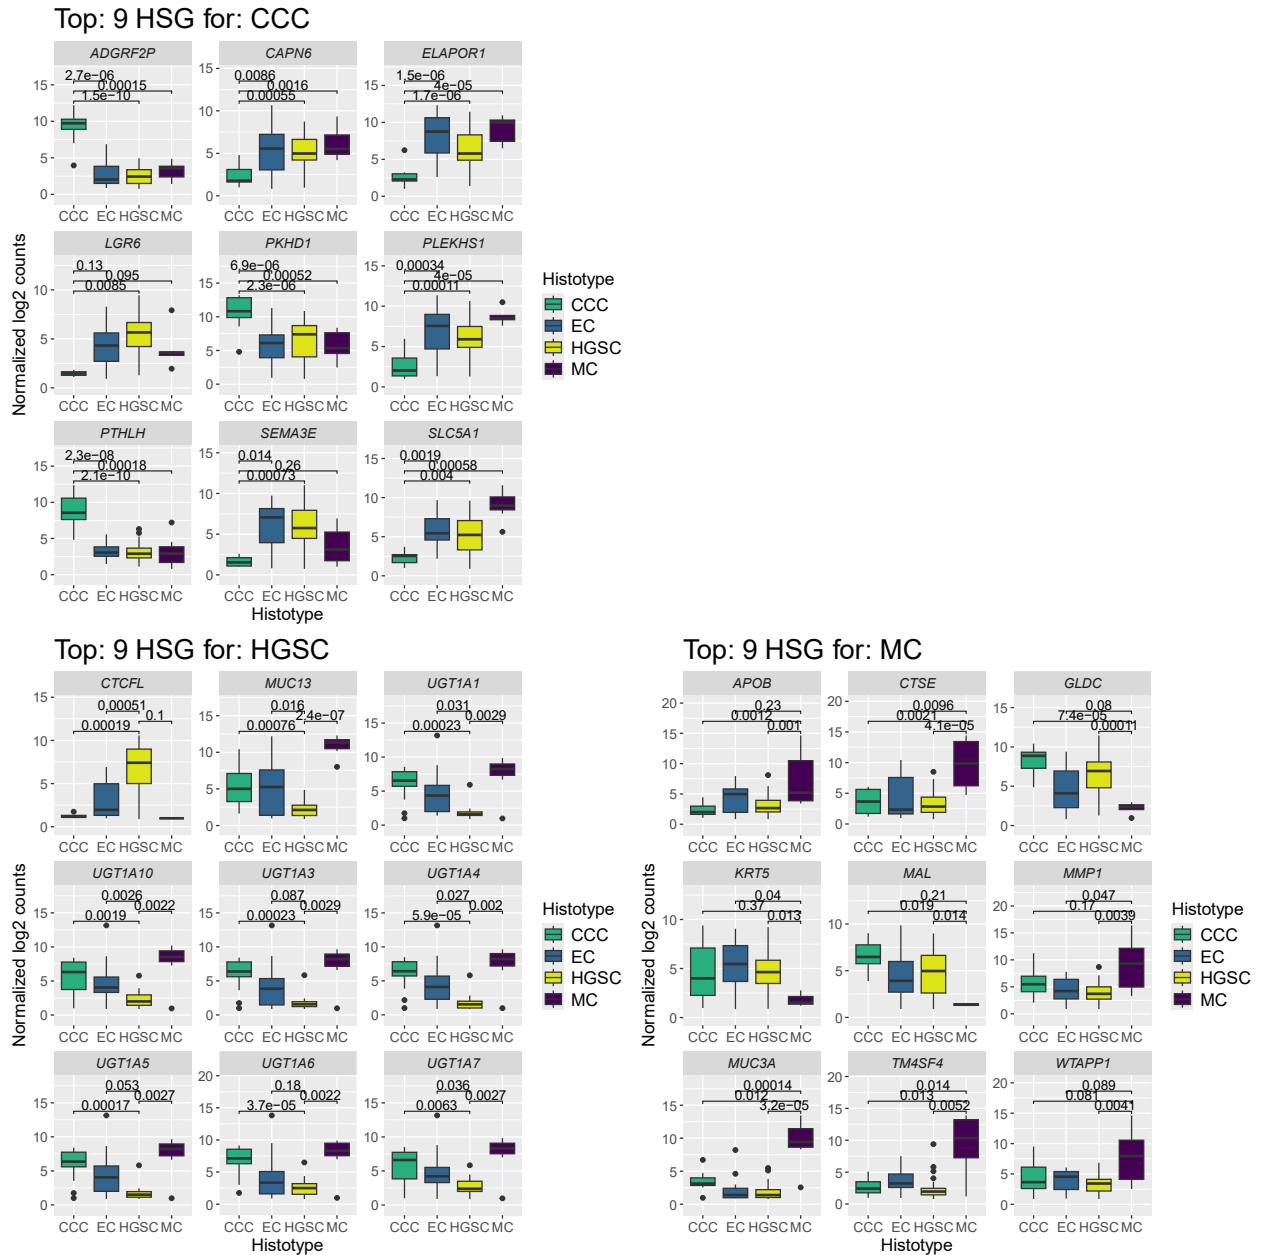

Most variable HSGs in training cohort for each histotype. Values over boxplots indicate wilcoxon test p-value. *CCC*: Clear cell carcinoma, *EC*: Endometrioid carcinoma, *HGSC*: High grade serous carcinoma, *MC*: Mucinous carcinoma, *HSG*: Histotype specific gene (classified as significantly differentially expressed gene in 3/3 possible histotype comparisons for a histotype of interest used as reference in comparisons). Plots created in r-package “ggplot”

**Table 4** Jackknifing results for MC samples on histotype comparisons using MC as reference. Jackknifing for non-MC samples not shown individually

| <b>Sample</b>           | <b>CCC vs. MC</b> | <b>EC vs. MC</b> | <b>HGSC vs. MC</b> |
|-------------------------|-------------------|------------------|--------------------|
| MC 1                    | 437               | 59               | 318                |
| MC 2                    | 402               | 38               | 269                |
| MC 3                    | 607               | 256              | 494                |
| MC 4                    | 392               | 32               | 256                |
| MC 5                    | 363               | 29               | 205                |
| MC 6                    | 379               | 31               | 212                |
| MC 7                    | 389               | 41               | 273                |
| DEG Range MC samples    | 363-607           | 29-256           | 205-494            |
| DEG Range no MC samples | 419-477           | 44-81            | 325-358            |

*DEG range:* Lowest to highest number of DEGs found when performing jackknifing for DEG analysis. *CCC:* Clear cell carcinoma, *EC:* Endometroid carcinoma, *HGSC:* High-grade serous carcinoma, *MC:* Mucinous carcinoma

**Figure 4** GO-term treemap of parent terms for significantly enriched DEG GO (BP) categories

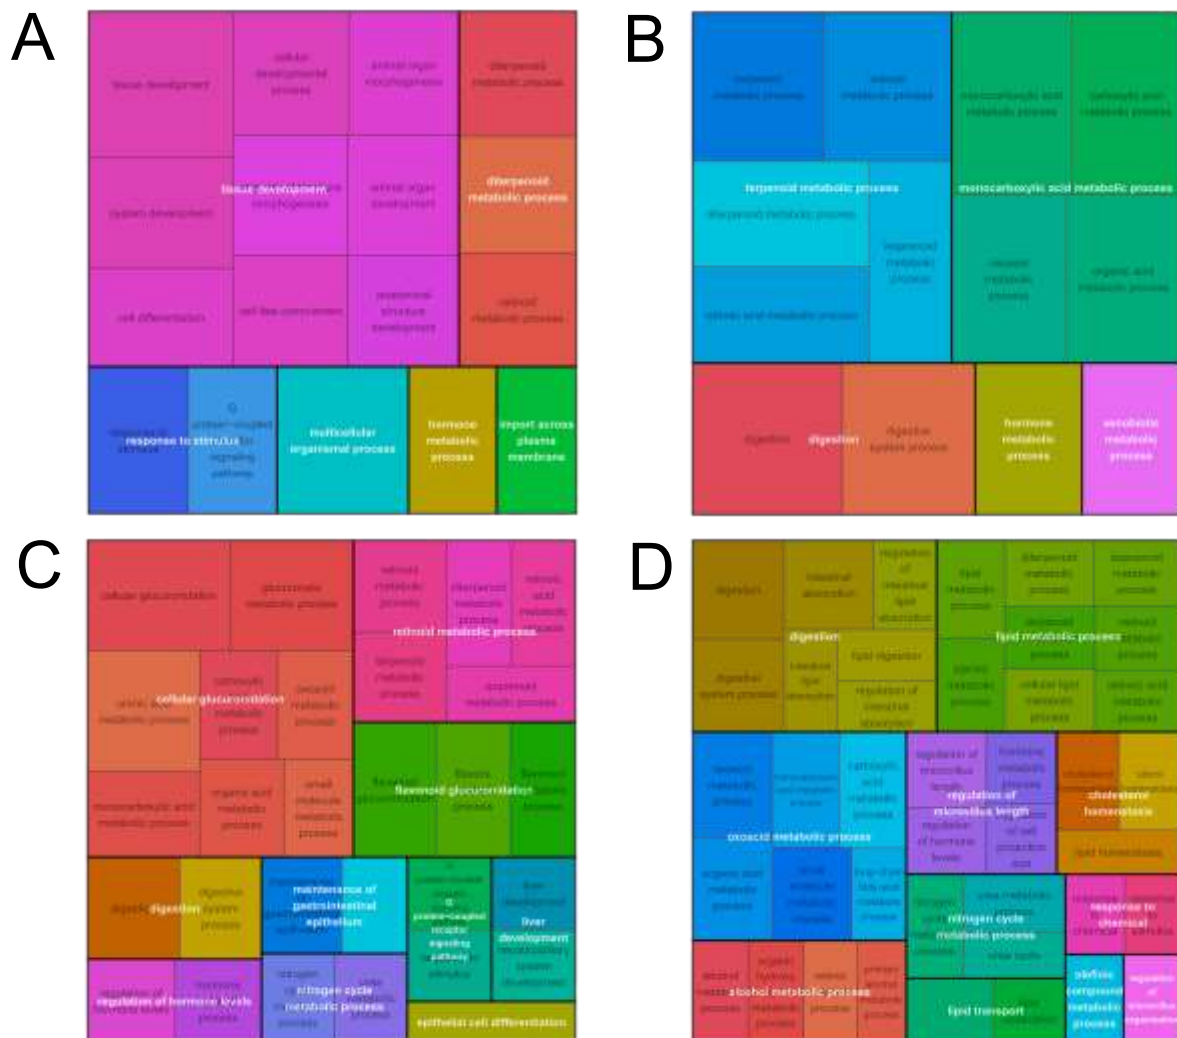

GO-term (BP) treemap of parent terms for DEG GO (BP) categories significantly enriched (adjusted overrepresented  $p$ value  $< 0.05$ ) in 2/3 comparisons using the same histotype as reference in the training cohort, **(A)**: Parental GO BP terms for DEGs in 2/3 CCC comparisons, **(B)**: Parental GO BP terms for DEGs in 2/3 EC comparisons, **(C)**: Parental GO BP terms for DEGs in 2/3 HGSC comparisons, **(D)**: Parental GO BP terms for DEGs in 2/3 MC comparisons. CCC: Clear cell carcinoma, EC: Endometrioid carcinoma, HGSC: High grade serous carcinoma, MC: Mucinous carcinoma. Plots created in r-package “rrvgo”

**Table 5** OncoScore results for CCC HSGs

| Gene      | Gene citations | Cancer-associated citations (%) | Oncoscore |
|-----------|----------------|---------------------------------|-----------|
| COLCA1    | 20             | 100                             | 76.86     |
| DRAIC     | 38             | 94.74                           | 76.69     |
| TTN-AS1   | 67             | 88.06                           | 73.54     |
| NAPSA     | 189            | 83.07                           | 72.08     |
| PLEKHS1   | 23             | 91.30                           | 71.12     |
| ELAPOR1   | 22             | 90.91                           | 70.52     |
| POU2AF3   | 7              | 100                             | 64.38     |
| PRIMA1    | 168            | 73.21                           | 63.31     |
| FBXO8     | 10             | 90                              | 62.91     |
| PTHLH     | 1454           | 68.64                           | 62.11     |
| VCAN-AS1  | 9              | 88.89                           | 60.85     |
| VWA2      | 28             | 75                              | 59.40     |
| RAB42     | 18             | 77.78                           | 59.13     |
| LINC01671 | 5              | 100                             | 56.93     |
| CPA4      | 64             | 67.19                           | 55.99     |
| PGBD5     | 29             | 68.97                           | 54.77     |
| BATF3     | 378            | 60.32                           | 53.27     |
| CPNE8     | 27             | 66.67                           | 52.65     |
| LINC00598 | 8              | 75                              | 50        |

HSGs with OncoScore > 50 (Cutoff for significance: Oncoscore > 21.09). *HSG*: Histotype specific gene, *CCC*: Clear cell carcinoma, *Oncoscore*: Relative measurement of articles mentioning a gene and cancer, to the total number of articles mentioning a gene, *HSG*: Histotype specific gene (classified as significantly differentially expressed gene in 3/3 possible histotype comparisons for a histotype of interest used as reference in comparisons)

**Table 6.** OncoScore results for HGSC HSGs

| Gene    | Gene citations | Cancer-associated citations (%) | Oncoscore |
|---------|----------------|---------------------------------|-----------|
| RASSF6  | 65             | 92.31                           | 76.98     |
| CTCF    | 170            | 83.53                           | 72.26     |
| AKR1B10 | 432            | 77.08                           | 68.28     |
| CDH17   | 245            | 74.69                           | 65.28     |
| MUC13   | 184            | 62.5                            | 54.19     |

HSGs with OncoScore > 50 (Cutoff for significance: Oncoscore > 21.09). *HSG*: Histotype specific gene, *HGSC*: High grade serous carcinoma, *Oncoscore*: Relative measurement of articles mentioning a gene and cancer, to the total number of articles mentioning a gene, *HSG*: Histotype specific gene (classified as significantly differentially expressed gene in 3/3 possible histotype comparisons for a histotype of interest used as reference in comparisons)

**Table 7.** OncoScore results for MC HSGs

| Gene     | Gene citations | Cancer-associated citations (%) | Oncoscore |
|----------|----------------|---------------------------------|-----------|
| HHLA2    | 152            | 96.05                           | 82.80     |
| KRT20    | 767            | 90.87                           | 81.39     |
| GSDMC    | 96             | 88.54                           | 75.10     |
| CLDN18   | 366            | 84.97                           | 74.99     |
| ANXA10   | 120            | 85                              | 72.69     |
| VSIG1    | 21             | 90.48                           | 69.88     |
| PRIMA1   | 168            | 73.21                           | 63.31     |
| TM4SF4   | 32             | 78.13                           | 62.5      |
| RAPGEFL1 | 6              | 100                             | 61.32     |
| WTAPP1   | 9              | 88.89                           | 60.85     |
| GALNT5   | 19             | 73.68                           | 56.34     |
| MUC12    | 86             | 61.63                           | 52.04     |

HSGs with OncoScore > 50 (Cutoff for significance: Oncoscore > 21.09). *HSG*: Histotype specific gene (classified as significantly differentially expressed gene in 3/3 possible histotype comparisons for a histotype of interest used as reference in comparisons), *MC*: Mucinous carcinoma, *Oncoscore*: Relative measurement of articles mentioning a gene and cancer, to the total number of articles mentioning a gene



**Table 8** Gene and HSG coverage in test-cohort datasets

| Name        | Gene coverage (%) | HSG coverage (%) |
|-------------|-------------------|------------------|
| GSE6008     | 12887/40570 (32%) | 117/282 (41%)    |
| GSE44104    | 19100/40570 (47%) | 162/282 (57%)    |
| GSE2109     | 19890/40570 (49%) | 162/282 (57%)    |
| E-MTAB-1814 | 22953/40570 (57%) | 187/282 (66%)    |

*Gene Coverage:* Total number of probes mapping to a gene with a gene symbol, in relation to the total number of genes with gene symbol in the training cohort *HSG:* Histotype specific gene (classified as significantly differentially expressed gene in 3/3 possible histotype comparisons for a histotype of interest used as reference in comparisons)

**Table 9** Predictive classification statistics for multiclass models using PGs

| Cohort      | Histotype | Sensitivity | Specificity | Model AUC | Features |
|-------------|-----------|-------------|-------------|-----------|----------|
| GSE6008     | CCC       | 0.94        | 0.99        | 0.92      | 11       |
| GSE6008     | EC        | 0.74        | 0.81        | -         | 20       |
| GSE6008     | HGSC      | 0.76        | 0.89        | -         | 24       |
| GSE6008     | MC        | 0.89        | 0.96        | -         | 12       |
| GSE44104    | CCC       | 0.76        | 0.95        | 0.96      | 10       |
| GSE44104    | EC        | 0.82        | 0.92        | -         | 21       |
| GSE44104    | HGSC      | 0.89        | 0.92        | -         | 23       |
| GSE44104    | MC        | 0.97        | 1           | -         | 15       |
| E-MTAB-1814 | CCC       | 0.76        | 0.91        | 0.85      | 11       |
| E-MTAB-1814 | EC        | 0.71        | 0.91        | -         | 19       |
| E-MTAB-1814 | HGSC      | 0.63        | 0.9         | -         | 21       |
| E-MTAB-1814 | MC        | 0.75        | 0.87        | -         | 12       |
| GSE2109     | CCC       | 0.54        | 0.9         | 0.79      | 11       |
| GSE2109     | EC        | 0.58        | 0.76        | -         | 20       |
| GSE2109     | HGSC      | 0.68        | 0.84        | -         | 21       |
| GSE2109     | MC        | 0.63        | 0.96        | -         | 11       |

Mean values for cross-validated XGB classification (folds=5, resamples=100) constructed through PGs. *Sensitivity:* True positives/(True positives + False negatives), *Specificity:* True negatives/(True negatives + False positives), *AUC:* Area under ROC curve, *Features:* Genes used as predictors in classifier model, *PG:* Predictor Gene (classified as significantly differentially expressed gene in 2/3 possible histotype comparisons for a histotype of interest used as

reference in comparisons). *CCC*: Clear cell carcinoma, *EC*: Endometrioid carcinoma, *HGSC*: High grade serous carcinoma, *MC*: Mucinous carcinoma

**Table 10** Predictive classification statistics for binary XGB models using PGs

| <b>Cohort</b> | <b>Histotype</b> | <b>Sensitivity</b> | <b>Specificity</b> | <b>AUC</b> | <b>Features</b> |
|---------------|------------------|--------------------|--------------------|------------|-----------------|
| GSE6008       | CCC              | 0.93               | 1                  | 1          | 17              |
| GSE6008       | EC               | 0.57               | 0.82               | 0.75       | 10              |
| GSE6008       | HGSC             | 0.88               | 0.8                | 0.9        | 16              |
| GSE6008       | MC               | 0.79               | 0.93               | 0.93       | 25              |
| GSE44104      | CCC              | 0.65               | 0.96               | 0.94       | 21              |
| GSE44104      | EC               | 0.5                | 0.91               | 0.85       | 10              |
| GSE44104      | HGSC             | 0.86               | 0.86               | 0.9        | 16              |
| GSE44104      | MC               | 0.99               | 1                  | 1          | 5               |
| E-MTAB-1814   | CCC              | 0.79               | 0.95               | 0.87       | 30              |
| E-MTAB-1814   | EC               | 0.64               | 0.88               | 0.86       | 5               |
| E-MTAB-1814   | HGSC             | 0.7                | 0.89               | 0.9        | 9               |
| E-MTAB-1814   | MC               | 0.55               | 0.82               | 0.73       | 11              |
| GSE2109       | CCC              | 0.61               | 0.88               | 0.84       | 25              |
| GSE2109       | EC               | 0.59               | 0.75               | 0.72       | 10              |
| GSE2109       | HGSC             | 0.76               | 0.81               | 0.86       | 16              |
| GSE2109       | MC               | 0.74               | 0.91               | 0.91       | 27              |

Mean values for cross-validated XGB classification (folds=5, resamples=100) constructed through PGs. *Sensitivity*: True positives/(True positives + False negatives), *Specificity*: True negatives/(True negatives + False positives), *AUC*: Area under ROC curve, *Features*: Genes used as predictors in classifier model, *PG*: Predictor Gene (classified as significantly differentially expressed gene in 2/3 possible histotype comparisons for a histotype of interest used as reference in comparisons). *CCC*: Clear cell carcinoma, *EC*: Endometrioid carcinoma, *HGSC*: High grade serous carcinoma, *MC*: Mucinous carcinoma

**Table 11** Predictive classification statistics for binary XGB models using HSGs

| <b>Cohort</b> | <b>Histotype</b> | <b>Sensitivity</b> | <b>Specificity</b> | <b>AUC</b> | <b>Features</b> |
|---------------|------------------|--------------------|--------------------|------------|-----------------|
| GSE6008       | CCC              | 0.92               | 1                  | 1          | 6               |
| GSE6008       | EC               | NA                 | NA                 | NA         | NA              |
| GSE6008       | HGSC             | 0.97               | 0.87               | 0.81       | 11              |
| GSE6008       | MC               | 0.78               | 0.96               | 0.91       | 16              |
| GSE44104      | CCC              | 0.67               | 0.81               | 0.76       | 6               |
| GSE44104      | EC               | NA                 | NA                 | NA         | NA              |
| GSE44104      | HGSC             | 0.88               | 0.82               | 0.93       | 6               |
| GSE44104      | MC               | 1                  | 1                  | 1          | 26              |
| E-MTAB-1814   | CCC              | 0.78               | 0.92               | 0.86       | 6               |
| E-MTAB-1814   | EC               | NA                 | NA                 | NA         | NA              |
| E-MTAB-1814   | HGSC             | 0.78               | 0.82               | 0.86       | NA              |
| E-MTAB-1814   | MC               | 0.75               | 0.87               | 0.86       | 9               |
| GSE2109       | CCC              | 0.7                | 0.96               | 0.88       | 8               |
| GSE2109       | EC               | NA                 | NA                 | NA         | NA              |
| GSE2109       | HGSC             | 0.9                | 0.77               | 0.9        | 7               |
| GSE2109       | MC               | 0.72               | 0.96               | 0.97       | 11              |

Mean values for cross-validated XGB classification (folds=5, resamples=100) constructed through PGs. *Sensitivity*: True positives/(True positives + False negatives), *Specificity*: True negatives/(True negatives + False positives), *AUC*: Area under ROC curve, *Features*: Genes used as predictors in classifier model, *HSG*: Histotype specific gene (classified as significantly differentially expressed gene in 3/3 possible histotype comparisons for a histotype of interest used as reference in comparisons), *CCC*: Clear cell carcinoma, *EC*: Endometrioid carcinoma, *HGSC*: High grade serous carcinoma, *MC*: Mucinous carcinoma

**Figure 5** PCA plots for 116 probes mapping to HSGs and top 116 most variable probes in test-cohort dataset GSE6008

## GSE6008

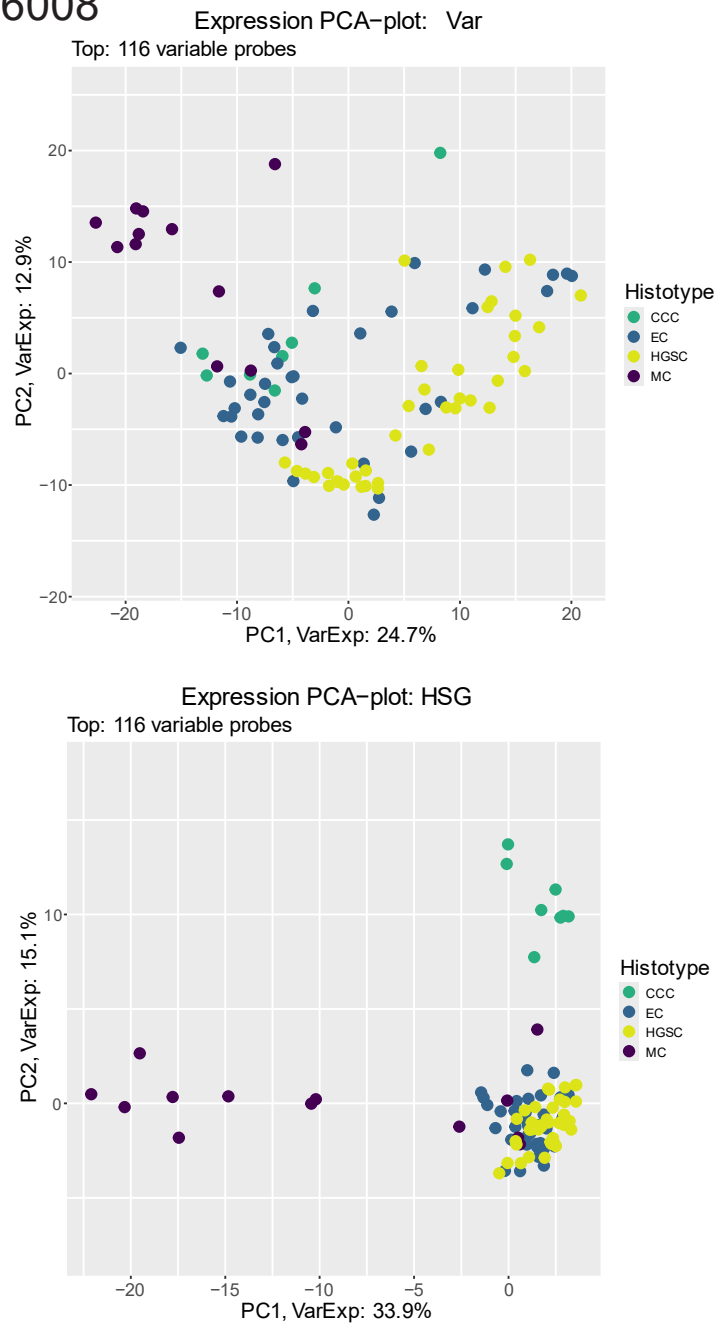

*HSG*: Histotype specific gene (classified as significantly differentially expressed gene in 3/3 possible histotype comparisons for a histotype of interest used as reference in comparisons), *CCC*: Clear cell carcinoma, *EC*: Endometrioid carcinoma, *HGSC*: High grade serous carcinoma, *MC*: Mucinous carcinoma. Created in r-package “ggplot”

**Figure 6** PCA plots for 287 probes mapping to HSGs and top 287 most variable probes in test-cohort dataset GSE44104

## GSE44104

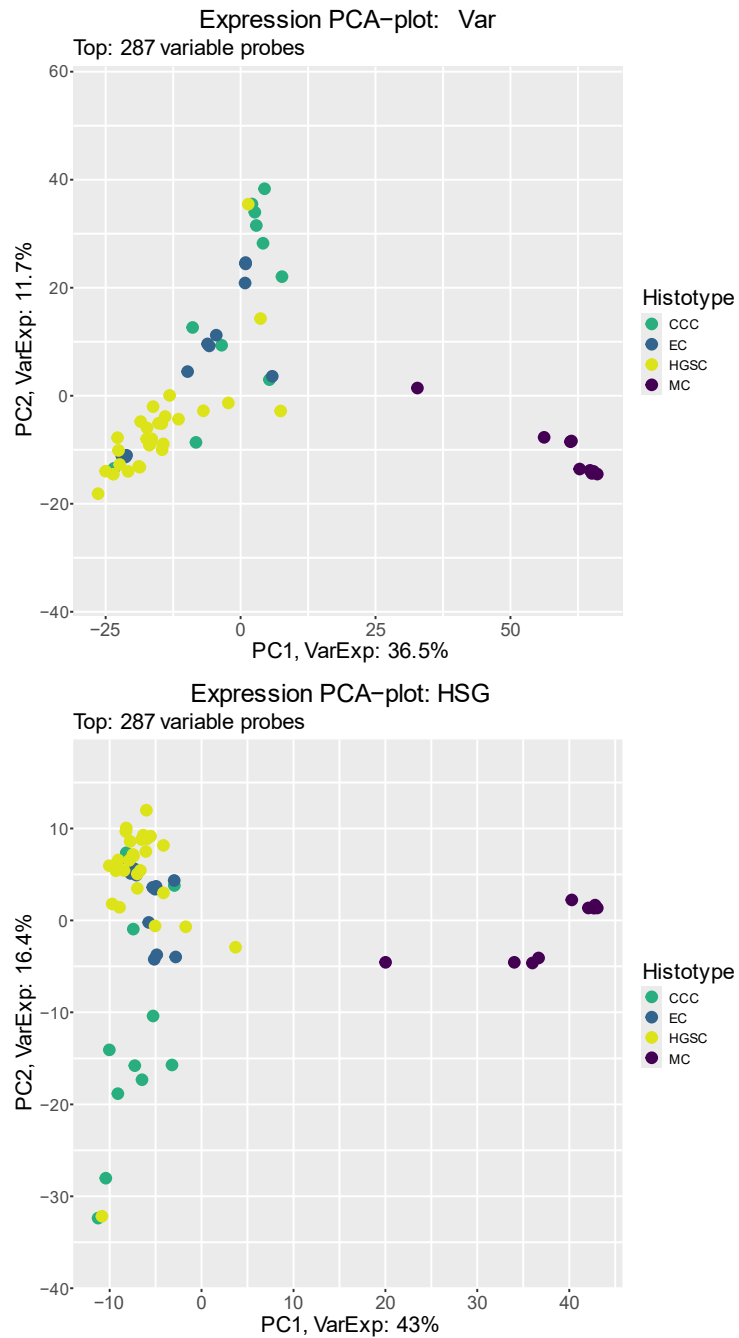

*HSG*: Histotype specific gene (classified as significantly differentially expressed gene in 3/3 possible histotype comparisons for a histotype of interest used as reference in comparisons), *CCC*: Clear cell carcinoma, *EC*: Endometrioid carcinoma, *HGSC*: High grade serous carcinoma, *MC*: Mucinous carcinoma. Created in r-package “ggplot”

**Figure 7** PCA plots for 279 probes mapping to HSGs and top 279 most variable probes in test-cohort dataset E-MTAB-1814

## E-MTAB-1814

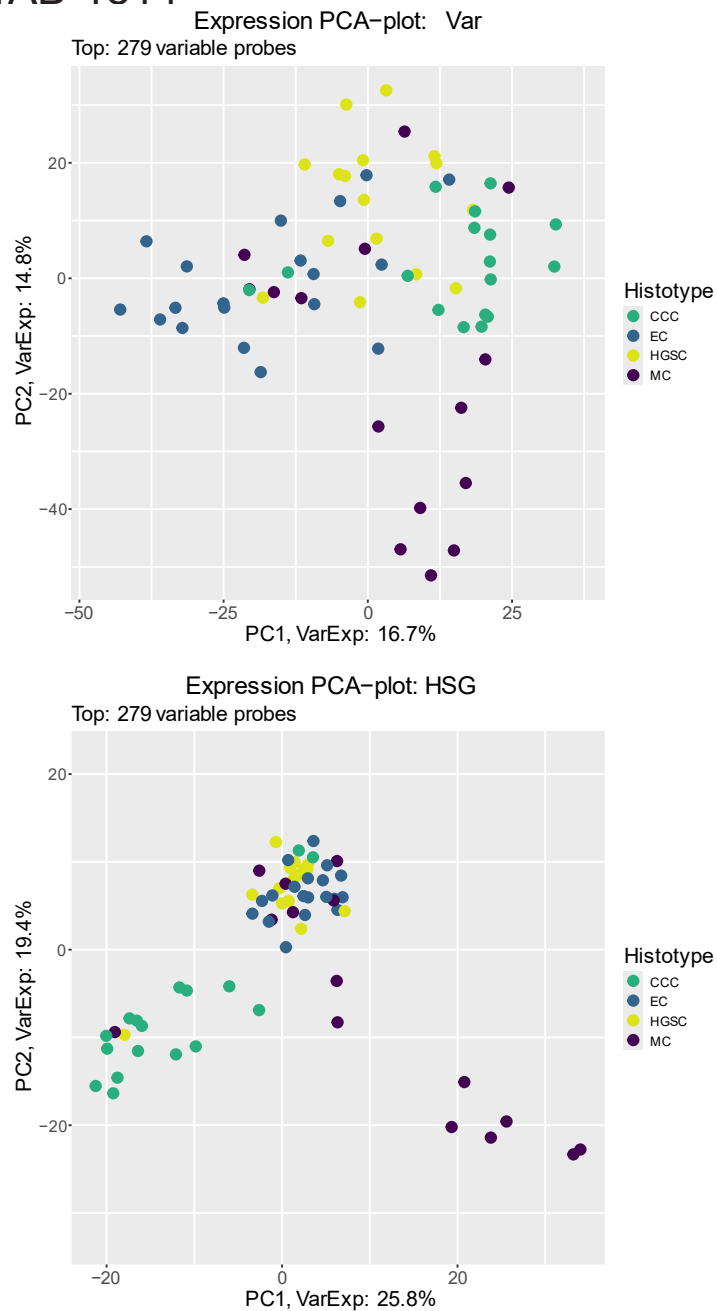

*HSG*: Histotype specific gene (classified as significantly differentially expressed gene in 3/3 possible histotype comparisons for a histotype of interest used as reference in comparisons), *CCC*: Clear cell carcinoma, *EC*: Endometrioid carcinoma, *HGSC*: High grade serous carcinoma, *MC*: Mucinous carcinoma. Created in r-package “ggplot”

**Figure 8** PCA plots for 371 probes mapping to HSGs and top 371 most variable probes in test-cohort dataset GSE2109

## GSE2109

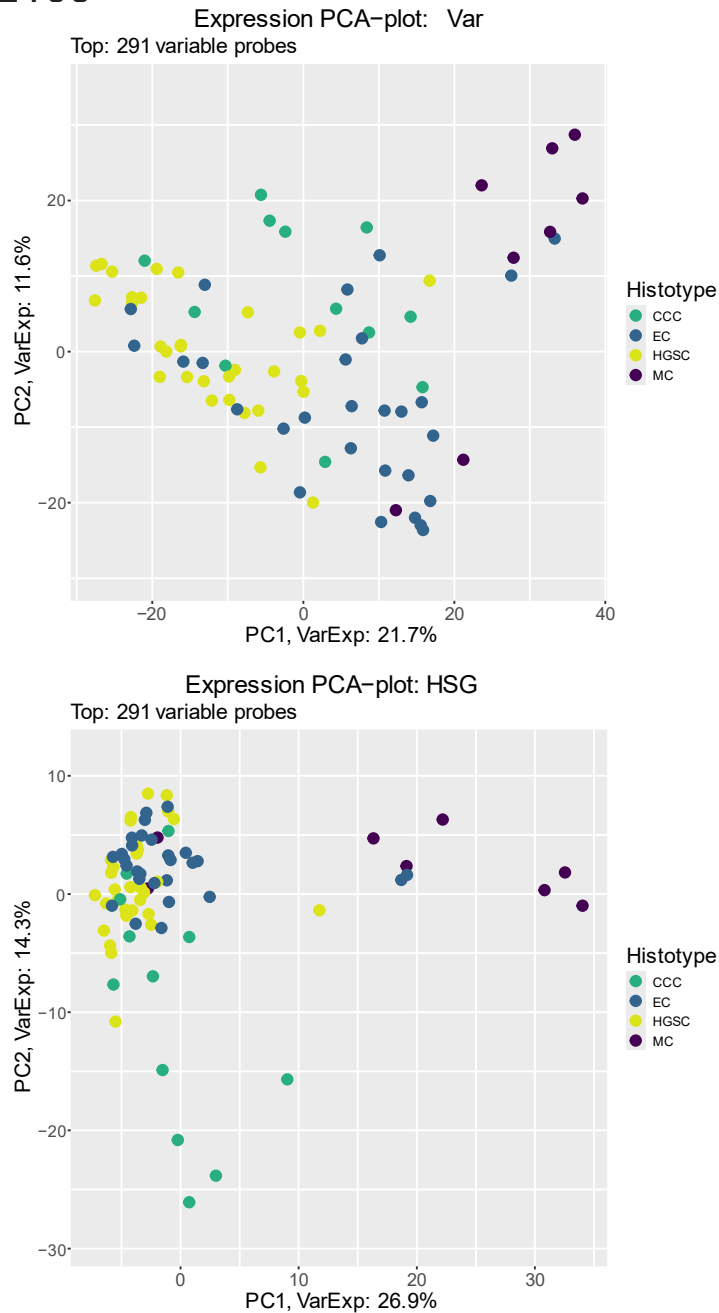

*HSG*: Histotype specific gene (classified as significantly differentially expressed gene in 3/3 possible histotype comparisons for a histotype of interest used as reference in comparisons), *CCC*: Clear cell carcinoma, *EC*: Endometrioid carcinoma, *HGSC*: High grade serous carcinoma, *MC*: Mucinous carcinoma. Created in r-package “ggplot”

**Figure 9** Hierarchical clustering of training cohort

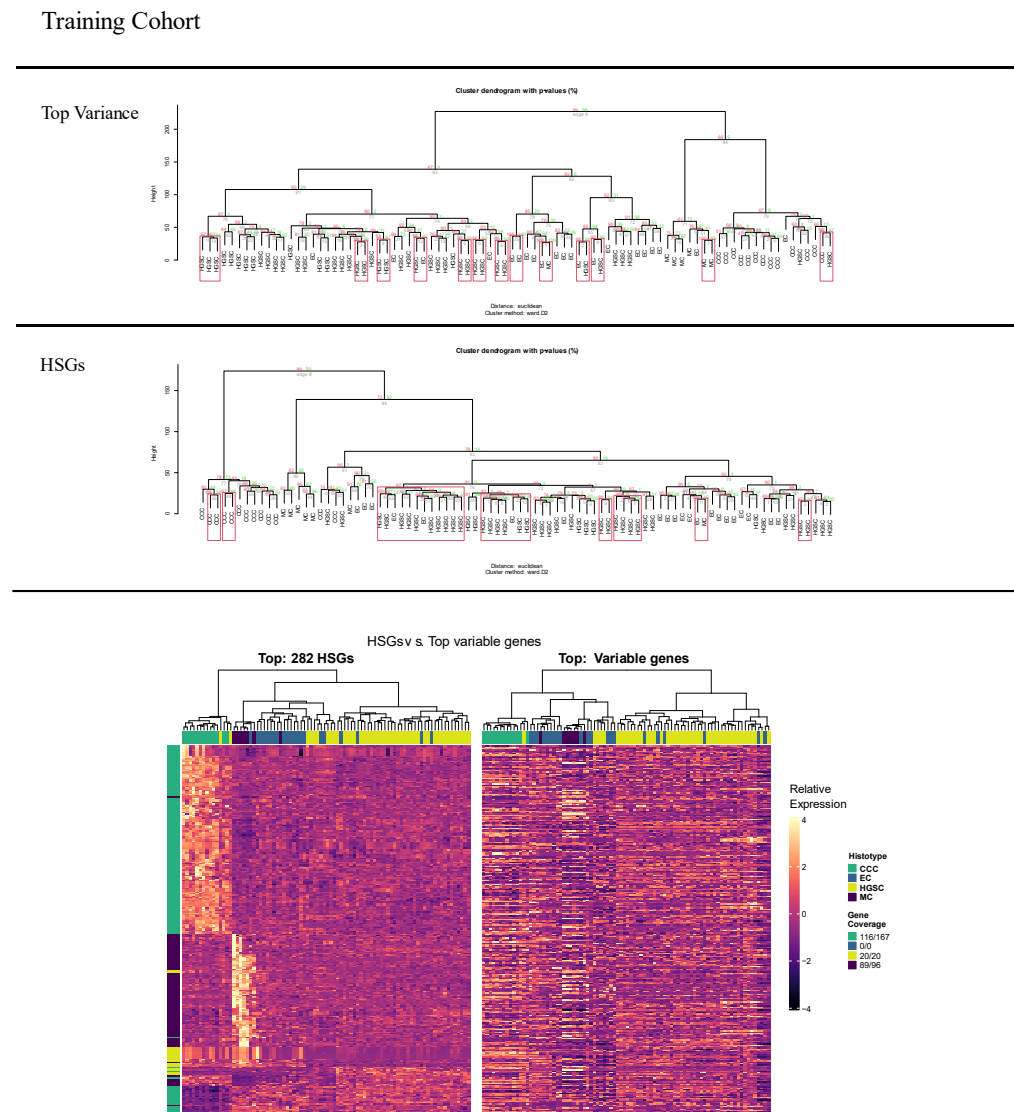

Upper plots: Hierarchical clustering of training cohort (Euclidean distance, Ward.D2) with p-values, bootstrap probability for training cohort for 282 HSGs (bottom) and the 282 most variable genes (top). *Top Variance/variable*: Most n (n=number of HSGs in dataset) variable genes in cohort, *Red AU*: approximately unbiased p-value, *Green BP*: bootstrap probability. *Red box*: AU  $\geq 0.95$  (95%). Created in r package “pvclust”. Lower plot: Heatmaps of training cohort dataset with hierarchical clustering (Euclidean distance, Ward.D2) for HSGs (left) and the most variable genes (right). Color mapping for heatmaps indicative of z-score for gene expression. *HSG*: Histotype specific gene (classified as significantly differentially expressed gene in 3/3 possible histotype comparisons for a histotype of interest used as reference in comparisons), *CCC*: Clear cell carcinoma, *EC*: Endometroid carcinoma, *HGSC*: High-grade serous carcinoma, *MC*: Mucinous carcinoma, *Gene Coverage*: Number of HSGs with a mapping probe in the array, in relation to total number of HSGs with gene symbol. Created in r-package “ComplexHeatmap”



**Figure 10** Hierarchical clustering of test cohort dataset GSE6008

GSE6008

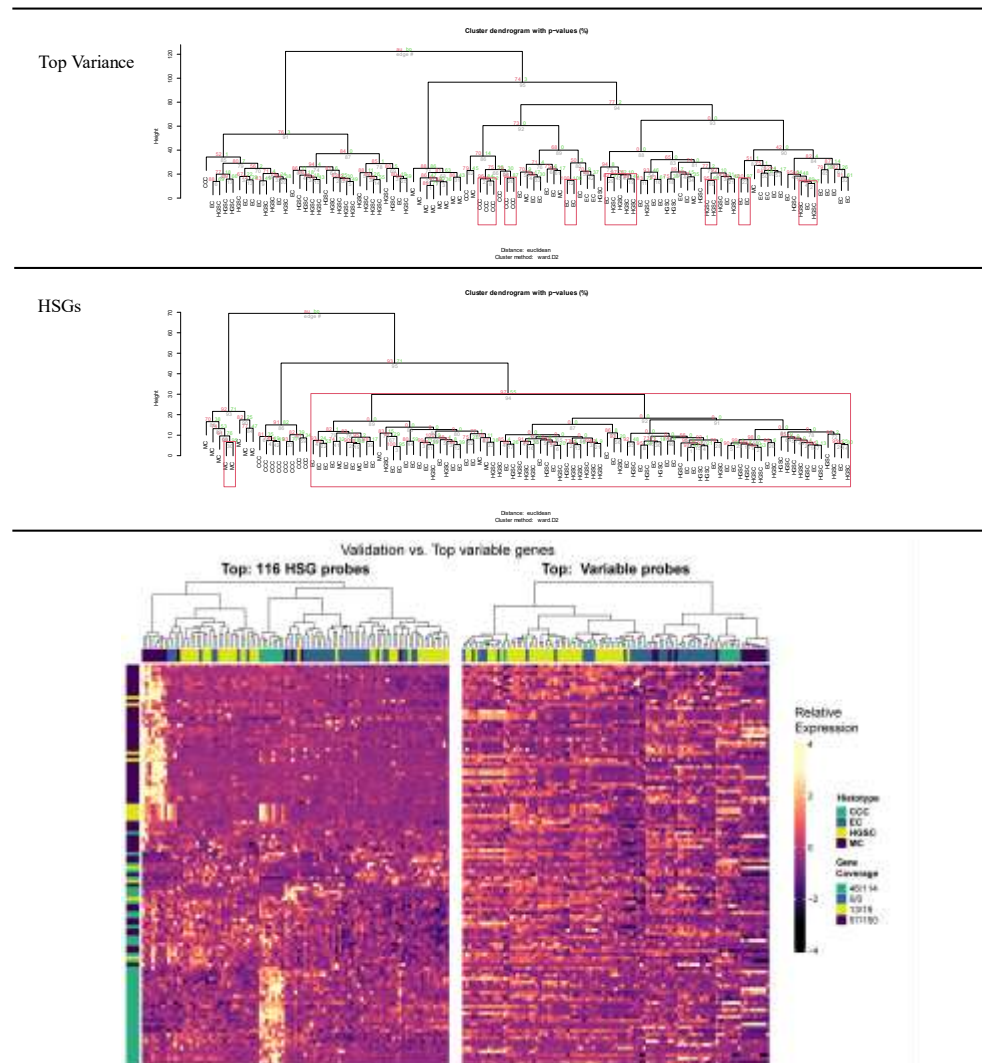

Upper plots: Hierarchical clustering of test cohort dataset GSE6008 (Euclidean distance, Ward.D2) with p-values, bootstrap probability for 116 probes mapping to HSGs (bottom) and the 116 most variable probes (top). *Top Variance/variable*: Most n (n=number of HSGs in dataset) variable genes in cohort, Red AU: approximately unbiased p-value, Green BP: bootstrap probability. Red box: AU  $\geq 0.95$  (95%). Created in r package “pvclust”.

Lower plot: Heatmaps of training cohort dataset with hierarchical clustering (Euclidean distance, Ward.D2) for HSGs (left) and the most variable genes (right). Color mapping for heatmaps indicative of z-score for gene expression. *HSG*: Histotype specific gene (classified as significantly differentially expressed gene in 3/3 possible histotype comparisons for a histotype of interest used as reference in comparisons), *CCC*: Clear cell carcinoma, *EC*: Endometroid carcinoma, *HGSC*: High-grade serous carcinoma, *MC*: Mucinous carcinoma, *Gene Coverage*: Number of HSGs with a mapping probe in the array, in relation to total number of HSGs with gene symbol. Created in r-package “ComplexHeatmap”

**Figure 11** Upper plots: Hierarchical clustering of test cohort dataset GSE44104

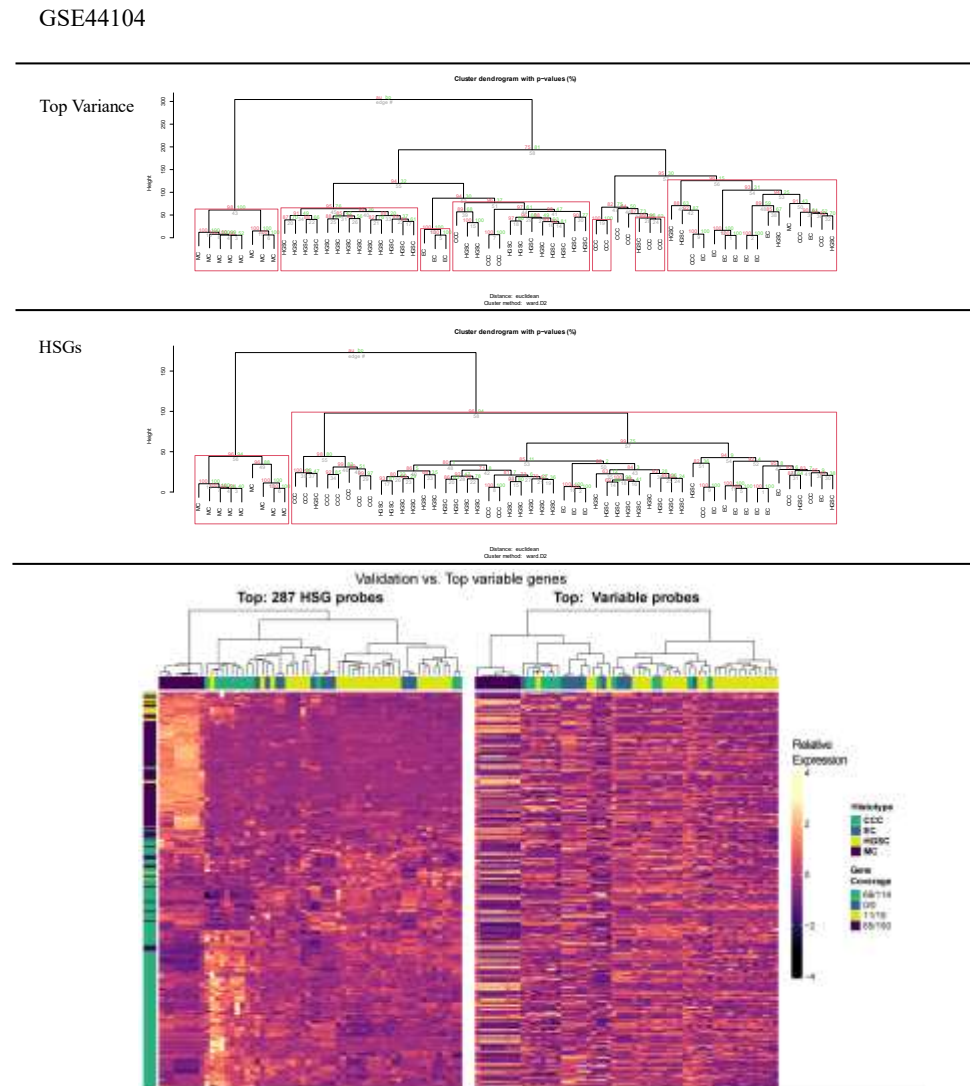

Upper plots: Hierarchical clustering of test cohort dataset GSE44104 (Euclidean distance, Ward.D2) with p-values, bootstrap probability for 287 probes mapping to HSGs (bottom) and the 287 most variable probes (top). *Top Variance/variable*: Most n (n=number of HSGs in dataset) variable genes in cohort, *Red AU*: approximately unbiased p-value, *Green BP*: bootstrap probability. *Red box*: AU  $\geq$  0.95 (95%). Created in r package “pvclust”.

Lower plot: Heatmaps of training cohort dataset with hierarchical clustering (Euclidean distance, Ward.D2) for HSGs (left) and the most variable genes (right). Color mapping for heatmaps indicative of z-score for gene expression. *HSG*: Histotype specific gene (classified as significantly differentially expressed gene in 3/3 possible histotype comparisons for a histotype of interest used as reference in comparisons), *CCC*: Clear cell carcinoma, *EC*: Endometroid carcinoma, *HGSC*: High-grade serous carcinoma, *MC*: Mucinous carcinoma, *Gene Coverage*: Number of HSGs with a mapping probe in the array, in relation to total number of HSGs with gene symbol. Created in r-package “ComplexHeatmap”

**Figure 12** Hierarchical clustering of test cohort dataset GSE2109

GSE2109

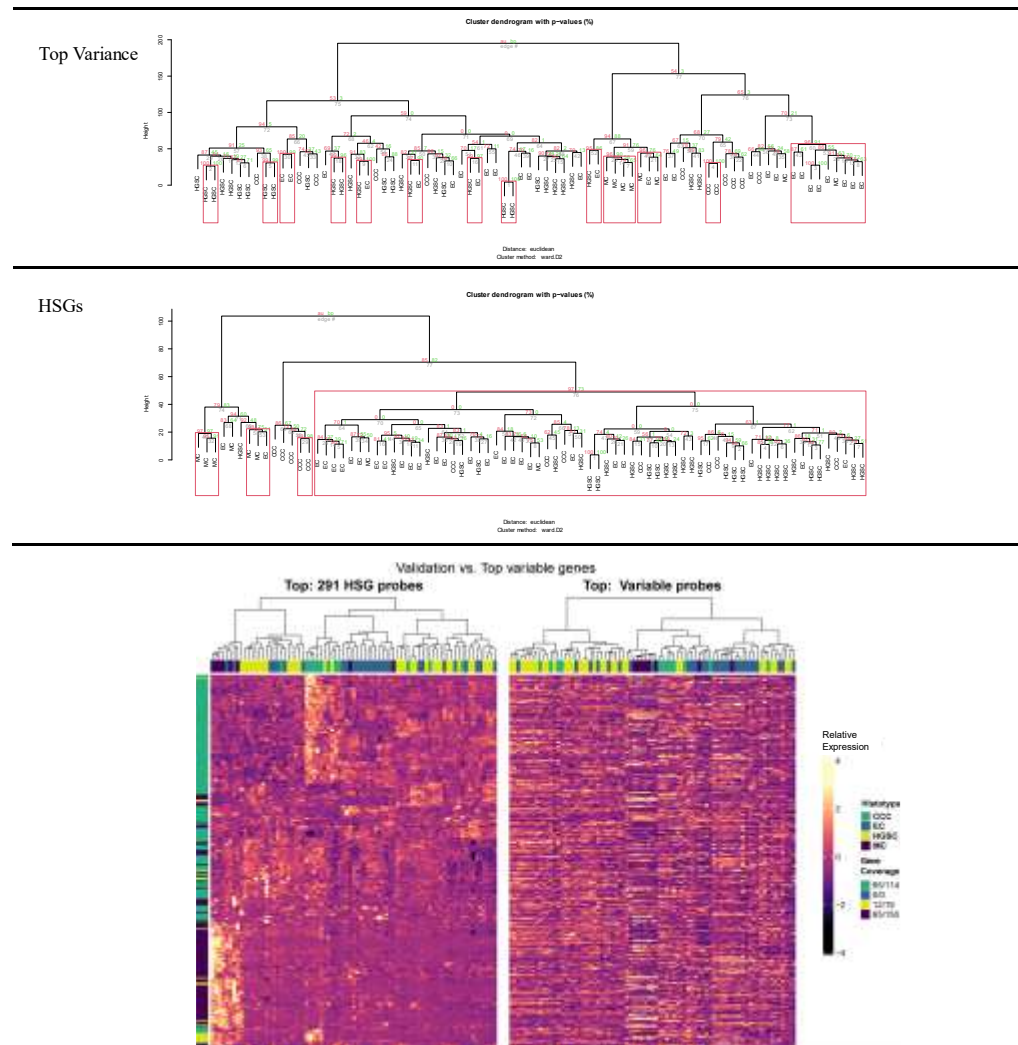

Upper plots: Hierarchical clustering of test cohort dataset GSE2109 (Euclidean distance, Ward.D2) with p-values, bootstrap probability for 371 probes mapping to HSGs (bottom) and the 371 most variable probes (top). *Top Variance/variable*: Most n (n=number of HSGs in dataset) variable genes in cohort, Red AU: approximately unbiased p-value, Green BP: bootstrap probability. Red box: AU  $\geq 0.95$  (95%). Created in r package “pvclust”. Lower plot: Heatmaps of training cohort dataset with hierarchical clustering (Euclidean distance, Ward.D2) for HSGs (left) and the most variable genes (right). Color mapping for heatmaps indicative of z-score for gene expression. *HSG*: Histotype specific gene (classified as significantly differentially expressed gene in 3/3 possible histotype comparisons for a histotype of interest used as reference in comparisons), *CCC*: Clear cell carcinoma, *EC*: Endometroid carcinoma, *HGSC*: High-grade serous carcinoma, *MC*: Mucinous carcinoma, *Gene Coverage*: Number of HSGs with a mapping probe in the array, in relation to total number of HSGs with gene symbol. Created in r-package “ComplexHeatmap”

**Figure 13** Hierarchical clustering of test cohort dataset E-MTAB-1814

EMTAB1814

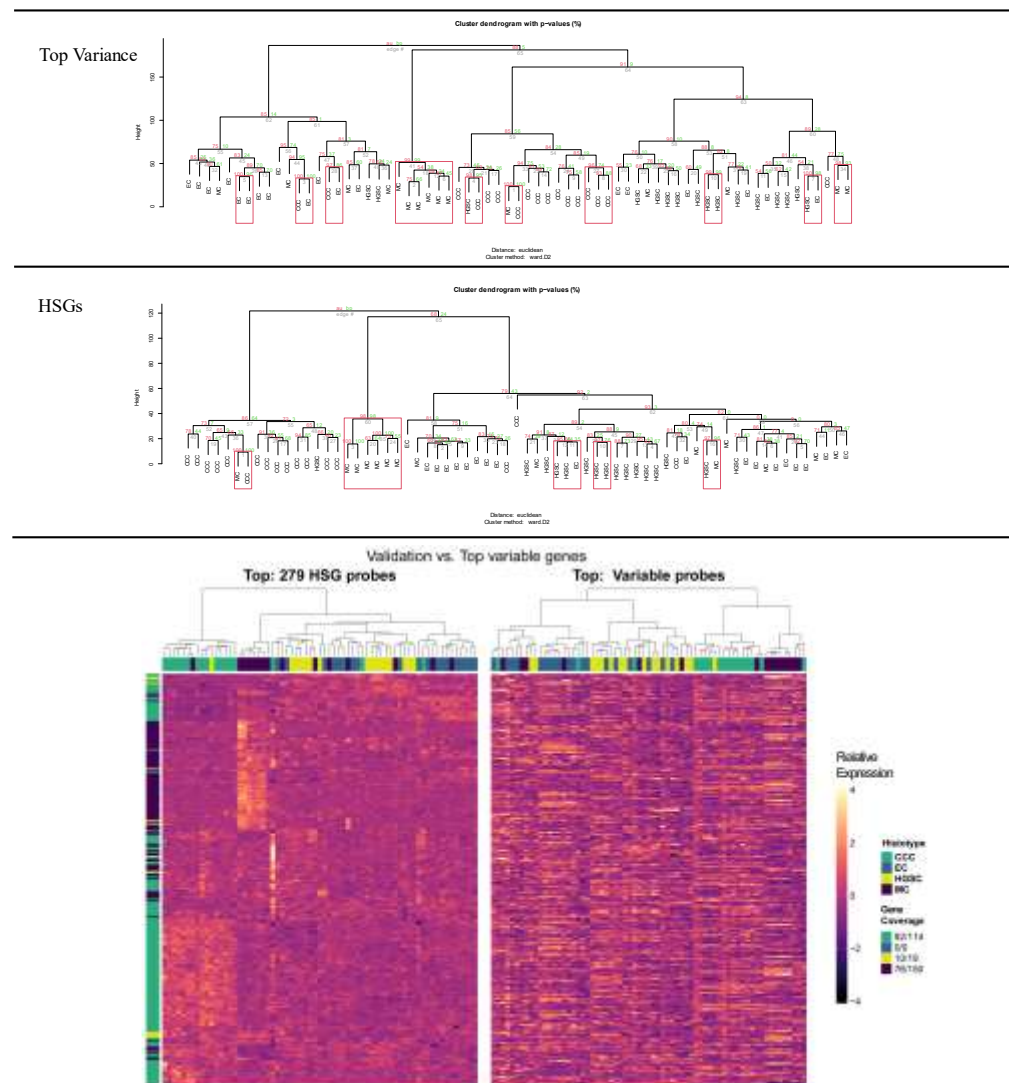

Upper plots: Hierarchical clustering of test cohort dataset E-MTAB-1814 (Euclidean distance, Ward.D2) with p-values, bootstrap probability for 279 probes mapping to HSGs (bottom) and top 279 most variable probes (top). *Top Variance/variable*: Most n (n=number of HSGs in dataset) variable genes in cohort, *Red AU*: approximately unbiased p-value, *Green BP*: bootstrap probability. *Red box*: AU  $\geq 0.95$  (95%). Created in r package “pvclust”.

Lower plot: Heatmaps of training cohort dataset with hierarchical clustering (Euclidean distance, Ward.D2) for HSGs (left) and the most variable genes (right). Color mapping for heatmaps indicative of z-score for gene expression. *HSG*: Histotype specific gene (classified as significantly differentially expressed gene in 3/3 possible histotype comparisons for a histotype of interest used as reference in comparisons), *CCC*: Clear cell carcinoma, *EC*: Endometroid carcinoma, *HGSC*: High-grade serous carcinoma, *MC*: Mucinous carcinoma, *Gene Coverage*: Number of HSGs with a mapping probe in the array, in relation to total number of HSGs with gene symbol. Created in r-package “ComplexHeatmap”

**Table 12** Deg results for training and test cohorts

| Comparison | Training |     |         |     | Test     |      |         |      |             |     |
|------------|----------|-----|---------|-----|----------|------|---------|------|-------------|-----|
|            |          |     | GSE6008 |     | GSE44104 |      | GSE2019 |      | E-MTAB-1814 |     |
|            | Down     | Up  | Down    | Up  | Down     | Up   | Down    | Up   | Down        | Up  |
| CCC_EC     | 325      | 406 | 203     | 395 | 84       | 46   | 52      | 45   | 565         | 529 |
| CCC_HGSC   | 611      | 698 | 364     | 486 | 199      | 342  | 52      | 57   | 450         | 497 |
| CCC_MC     | 384      | 442 | 259     | 317 | 2257     | 1410 | 303     | 46   | 105         | 217 |
| EC_CCC     | 405      | 328 | 395     | 203 | 46       | 84   | 45      | 52   | 529         | 565 |
| EC_HGSC    | 19       | 100 | 60      | 43  | 369      | 579  | 80      | 124  | 62          | 180 |
| EC_MC      | 119      | 43  | 282     | 81  | 2292     | 2027 | 244     | 13   | 8           | 13  |
| HGSC_CCC   | 698      | 616 | 486     | 364 | 342      | 199  | 57      | 52   | 497         | 450 |
| HGSC_EC    | 98       | 32  | 43      | 60  | 579      | 369  | 124     | 80   | 180         | 62  |
| HGSC_MC    | 445      | 327 | 421     | 283 | 2866     | 2166 | 1031    | 363  | 216         | 164 |
| MC_CCC     | 407      | 390 | 317     | 259 | 1410     | 2257 | 46      | 303  | 217         | 105 |
| MC_EC      | 29       | 119 | 81      | 282 | 2027     | 2292 | 13      | 244  | 13          | 8   |
| MC_HGSC    | 300      | 445 | 283     | 421 | 2166     | 2866 | 363     | 1031 | 164         | 216 |

Significant differentially expressed gene (DEGs; Training) and probes (test) calls for training and test cohort

(Training: DESeq2  $\text{fdr} < 0.05$  | Test: Limma, Benjamini Hochberg adjusted  $p\text{-value} < 0.05$ ) for case (histotype in the comparison to the left) when compared to control (histotype in the comparison to the right). Comparisons for a dataset with less than 200 total significant differentially expressed genes/probes are highlighted in light grey. *Up*: Upregulated DEGs, *Down*: Downregulated DEGs, *CCC*: Clear cell carcinoma, *EC*: Endometroid carcinoma, *HGSC*: High-grade serous carcinoma, *MC*: Mucinous carcinoma

**Table 13** Statistics for CCC HSGs defined as DEG in  $\geq 2/4$  cohorts and  $>33\%$  of all possible histotype comparisons with associated histotype used as reference

| Gene       | Total DEG<br>frequency (%) | GSE6008 | GSE44104 | E-MTAB-1814 | GSE2109 |
|------------|----------------------------|---------|----------|-------------|---------|
| GABARAPL1  | 0.83                       | 3       | 3        | 2           | 2       |
| ARID3A     | 0.67                       | 3       | 2        | 3           | NA      |
| CTH        | 0.67                       | 3       | 2        | 3           | NA      |
| GPX3       | 0.67                       | 3       | 1        | 3           | 1       |
| LAMC1      | 0.67                       | 3       | 3        | 2           | NA      |
| RNASET2    | 0.67                       | 3       | 2        | 3           | NA      |
| STC1       | 0.67                       | 3       | 2        | 1           | 2       |
| WARS1      | 0.67                       | 3       | 1        | 2           | 2       |
| NABP1      | 0.67                       | 3       | 2        | 2           | NA      |
| PGBD5      | 0.67                       | 3       | 1        | 3           | NA      |
| VCAN       | 0.67                       | 3       | 1        | 3           | NA      |
| BATF3      | 0.5                        | 3       | 1        | 2           | NA      |
| CLIC5      | 0.5                        | 3       | 1        | 2           | NA      |
| CSGALNACT1 | 0.5                        | 3       | 2        | 1           | NA      |
| ELAPOR1    | 0.5                        | 2       | 1        | 1           | 2       |
| IGFBP3     | 0.5                        | 3       | 1        | 1           | 1       |
| IL6        | 0.5                        | 3       | NA       | 3           | NA      |
| NFIA       | 0.5                        | NA      | 2        | 3           | 1       |
| NUP50      | 0.5                        | 3       | 1        | 2           | NA      |
| PTH1R      | 0.5                        | 3       | NA       | 3           | NA      |
| PTHLH      | 0.5                        | 3       | NA       | 3           | NA      |
| RIMKLB     | 0.5                        | NA      | 3        | 3           | NA      |
| TRABD2B    | 0.5                        | NA      | 2        | 3           | 1       |
| WDR91      | 0.5                        | 3       | 1        | 2           | NA      |
| POU2AF3    | 0.42                       | NA      | 1        | 3           | 1       |
| RDH10      | 0.42                       | NA      | 1        | 3           | 1       |
| SLC7A2     | 0.42                       | 3       | NA       | 2           | NA      |
| SYNE2      | 0.42                       | 3       | 1        | 1           | NA      |
| CEP44      | 0.33                       | NA      | 1        | 3           | NA      |
| CR1L       | 0.33                       | NA      | 2        | 2           | NA      |
| CYTIP      | 0.33                       | 3       | NA       | 1           | NA      |
| GALNT11    | 0.33                       | 3       | 1        | NA          | NA      |

|         |      |    |    |   |    |
|---------|------|----|----|---|----|
| KIFC3   | 0.33 | 2  | 1  | 1 | NA |
| KNG1    | 0.33 | 2  | NA | 2 | NA |
| PLEKHS1 | 0.33 | NA | 2  | 2 | NA |
| SLC35F5 | 0.33 | NA | 2  | 2 | NA |
| SLC5A1  | 0.33 | NA | 1  | 2 | 1  |
| SLC8A1  | 0.33 | NA | 2  | 1 | 1  |

*HSG*: Histotype specific gene (classified as significantly differentially expressed gene in 3/3 possible histotype comparisons for a histotype of interest used as reference in comparisons), *DEG frequency*: Significant differentially expressed gene calls ( $\text{fdr} < 0.05$ , absolute value  $\log_2\text{FoldChange} > 0.585$ ) divided by total number of possible significant DEG calls, *CCC*: Clear cell carcinoma. Value in cells under test cohort name indicative of the number of significant DEG calls made for possible (n=3) histotype comparisons using histotype associated with HSG as reference

**Table 14** Statistics for HGSC HSGs defined as DEG in  $\geq 2/4$  cohorts and  $>33\%$  of all possible histotype comparisons with associated histotype used as reference

| Gene    | Total DEG<br>frequency (%) | GSE6008 | GSE44104 | E-MTAB-1814 | GSE2109 |
|---------|----------------------------|---------|----------|-------------|---------|
| RASSF6  | 0.5                        | NA      | 3        | NA          | 3       |
| UGT1A1  | 0.5                        | 2       | 1        | 2           | 1       |
| UGT1A10 | 0.5                        | 2       | 1        | 2           | 1       |
| UGT1A3  | 0.5                        | 2       | 1        | 2           | 1       |
| UGT1A6  | 0.5                        | 2       | 1        | 2           | 1       |
| UGT1A9  | 0.5                        | 2       | 1        | 2           | 1       |
| MUC13   | 0.42                       | 2       | 2        | NA          | 1       |
| TGM1    | 0.42                       | 2       | 2        | 1           | NA      |
| UGT1A8  | 0.42                       | 1       | 1        | 2           | 1       |
| AKR1B10 | 0.33                       | 2       | 1        | NA          | 1       |
| CTCFL   | 0.33                       | NA      | 2        | NA          | 2       |
| UGT1A4  | 0.33                       | NA      | 1        | 2           | 1       |
| UGT1A5  | 0.33                       | NA      | 1        | 2           | 1       |
| UGT1A7  | 0.33                       | NA      | 1        | 2           | 1       |

*HSG*: Histotype specific gene (classified as significantly differentially expressed gene in 3/3 possible histotype comparisons for a histotype of interest used as reference in comparisons), *DEG frequency*: Significant differentially expressed gene calls ( $\text{fdr} < 0.05$ , absolute value  $\log_2\text{FoldChange} > 0.585$ ) divided by total number of possible significant DEG calls, *HGSC*: High-grade serous carcinoma. Value in cells under test cohort name indicative of the number of significant DEG calls made for possible (n=3) histotype comparisons using histotype associated with HSG as reference



**Table 15** Statistics for MC HSGs defined as DEG in  $\geq 2/4$  cohorts and  $>33\%$  of all possible histotype comparisons with associated histotype used as reference

| Gene     | Total DEG<br>frequency (%) | GSE6008 | GSE44104 | EMTAB1814 | GSE2109 |
|----------|----------------------------|---------|----------|-----------|---------|
| ATP10B   | 0.83                       | 3       | 3        | 1         | 3       |
| VILL     | 0.83                       | 3       | 3        | 1         | 3       |
| AKR7A3   | 0.75                       | 3       | 3        | NA        | 3       |
| BCL2L14  | 0.75                       | 3       | 3        | NA        | 3       |
| CLDN18   | 0.75                       | 2       | 3        | 1         | 3       |
| CYP3A5   | 0.75                       | 3       | 3        | 1         | 2       |
| GPX2     | 0.75                       | 2       | 3        | 1         | 3       |
| AHCYL2   | 0.67                       | 2       | 3        | NA        | 3       |
| ANXA10   | 0.67                       | 2       | 3        | NA        | 3       |
| CES2     | 0.67                       | 3       | 3        | NA        | 2       |
| FMO5     | 0.67                       | 2       | 3        | NA        | 3       |
| GLDC     | 0.67                       | 2       | 3        | 2         | 1       |
| KRT20    | 0.67                       | 2       | 3        | 1         | 2       |
| LYZ      | 0.67                       | 3       | 3        | NA        | 2       |
| MUC3A    | 0.67                       | 2       | 3        | 1         | 2       |
| NR1I2    | 0.67                       | 2       | 3        | NA        | 3       |
| VIL1     | 0.67                       | 2       | 3        | NA        | 3       |
| A1CF     | 0.58                       | 2       | 3        | NA        | 2       |
| BTNL8    | 0.58                       | 2       | 3        | NA        | 2       |
| CDHR2    | 0.58                       | 2       | 3        | NA        | 2       |
| CDHR5    | 0.58                       | 2       | 3        | NA        | 2       |
| CTSE     | 0.58                       | 2       | 3        | NA        | 2       |
| RAPGEFL1 | 0.58                       | 2       | 3        | NA        | 2       |
| TM4SF4   | 0.58                       | 2       | 3        | NA        | 2       |
| ADH1C    | 0.5                        | 2       | 3        | NA        | 1       |
| AGMAT    | 0.5                        | 1       | 3        | NA        | 2       |
| ALDOB    | 0.5                        | 2       | 3        | NA        | 1       |
| ANXA13   | 0.5                        | 2       | 3        | NA        | 1       |
| CYP3A4   | 0.5                        | 2       | 3        | NA        | 1       |
| GALNT5   | 0.5                        | NA      | 3        | NA        | 3       |
| LRRC66   | 0.5                        | NA      | 3        | NA        | 3       |
| MAL      | 0.5                        | 2       | 3        | NA        | 1       |

|          |      |    |   |    |    |
|----------|------|----|---|----|----|
| NHERF4   | 0.5  | NA | 3 | 1  | 2  |
| SLC26A3  | 0.5  | 2  | 3 | NA | 1  |
| ADTRP    | 0.42 | NA | 3 | NA | 2  |
| CLDN23   | 0.42 | NA | 3 | NA | 2  |
| GAU1     | 0.42 | NA | 3 | NA | 2  |
| MMP1     | 0.42 | 2  | 3 | NA | NA |
| OTC      | 0.42 | 2  | 3 | NA | NA |
| SLC39A5  | 0.42 | NA | 3 | NA | 2  |
| SULT1B1  | 0.42 | NA | 3 | NA | 2  |
| TNNT1    | 0.42 | 2  | 2 | NA | 1  |
| TUBAL3   | 0.42 | NA | 3 | 1  | 1  |
| VSIG1    | 0.42 | NA | 3 | NA | 2  |
| ANKRD33B | 0.33 | NA | 3 | NA | 1  |
| CYSTM1   | 0.33 | NA | 3 | NA | 1  |
| LIPH     | 0.33 | NA | 3 | NA | 1  |
| MOGAT2   | 0.33 | NA | 3 | NA | 1  |
| NAT2     | 0.33 | NA | 3 | NA | 1  |
| PRIMA1   | 0.33 | NA | 3 | NA | 1  |

*HSG*: Histotype specific gene (classified as significantly differentially expressed gene in 3/3 possible histotype comparisons for a histotype of interest used as reference in comparisons), *DEG frequency*: Significant differentially expressed gene calls ( $\text{fdr} < 0.05$ , absolute value  $\log_2\text{FoldChange} > 0.585$ ) divided by total number of possible significant DEG calls, *MC*: Mucinous carcinoma. Value in cells under test cohort name indicative of the number of significant DEG calls made for possible (n=3) histotype comparisons using histotype associated with HSG as reference

**Table 16** Statistics for HSGs found in multiclass predictive models and defined as DEG in  $\geq 2/4$  external cohorts for its associated histotype

| Gene     | Histotype | Total DEG<br>frequency (%) | GSE6008 | GSE2109 | GSE44104 | E-MTAB-1814 |
|----------|-----------|----------------------------|---------|---------|----------|-------------|
| ARID3A   | CCC       | 0.67                       | 3       | NA      | 2        | 3           |
| RNASET2  | CCC       | 0.67                       | 3       | NA      | 2        | 3           |
| WARS1    | CCC       | 0.67                       | 3       | 2       | 1        | 2           |
| VCAN     | CCC       | 0.58                       | 3       | NA      | 1        | 3           |
| IGFBP3   | CCC       | 0.5                        | 3       | 1       | 1        | 1           |
| RIMKLB   | CCC       | 0.5                        | NA      | NA      | 3        | 3           |
| RDH10    | CCC       | 0.42                       | NA      | 1       | 1        | 3           |
| SYNE2    | CCC       | 0.42                       | 3       | NA      | 1        | 1           |
| CEP44    | CCC       | 0.33                       | NA      | NA      | 1        | 3           |
| SLC35F5  | CCC       | 0.33                       | NA      | NA      | 2        | 2           |
| RASSF6   | HGSC      | 0.5                        | NA      | 3       | 3        | NA          |
| UGT1A6   | HGSC      | 0.5                        | 2       | 1       | 1        | 2           |
| MUC13    | HGSC      | 0.42                       | 2       | 1       | 2        | NA          |
| TGM1     | HSGC      | 0.42                       | 2       | NA      | 2        | 1           |
| UGT1A8   | HSGC      | 0.42                       | 1       | 1       | 1        | 2           |
| AKR1B10  | HGSC      | 0.33                       | 2       | 1       | 1        | NA          |
| CTCF     | HGSC      | 0.33                       | NA      | 2       | 2        | NA          |
| KRT20    | MC        | 0.58                       | 2       | 2       | 3        | 1           |
| CDHR2    | MC        | 0.58                       | 2       | 2       | 3        | NA          |
| CDHR5    | MC        | 0.58                       | 2       | 2       | 3        | NA          |
| AGMAT    | MC        | 0.5                        | 1       | 2       | 3        | NA          |
| ALDOB    | MC        | 0.5                        | 2       | 1       | 3        | NA          |
| ADTRP    | MC        | 0.42                       | NA      | 2       | 3        | NA          |
| ANKRD33B | MC        | 0.33                       | NA      | 1       | 3        | NA          |
| CYSTM1   | MC        | 0.33                       | NA      | 1       | 3        | NA          |
| PRIMA1   | MC        | 0.33                       | NA      | 1       | 3        | NA          |

*DEG frequency*: Significant differentially expressed gene calls ( $\text{fdr} < 0.05$ , absolute value  $\log_2\text{FoldChange} > 0.585$ ) divided by total number of possible significant DEG calls, *CCC*: Clear cell carcinoma, *EC*: Endometroid carcinoma, *HGSC*: High-grade serous carcinoma, *MC*: Mucinous carcinoma. Value in cells under test cohort name indicative of the number of significant DEG calls made for possible ( $n=3$ ) histotype comparisons using histotype associated with HSG as reference

**Table 17** The number of differentially methylated probes and regions with methylation-type in the training cohort

| Comparison group | DMP - Total | DMP - Hyper methylation | DMP - Hypo methylation | DMR - Total | DMR- Hyper methylation | DMR - Hypo methylation | Histotype Specific DMRs |
|------------------|-------------|-------------------------|------------------------|-------------|------------------------|------------------------|-------------------------|
| EC – CCC         | 4051        | 1456                    | 2595                   | 180         | 33                     | 147                    | 35                      |
| HGSC – CCC       | 32171       | 9276                    | 22895                  | 560         | 72                     | 488                    | 35                      |
| MC – CCC         | 18286       | 3173                    | 15113                  | 327         | 62                     | 265                    | 35                      |
| CCC – EC         | 4051        | 2595                    | 1456                   | 180         | 147                    | 33                     | 0                       |
| HGSC – EC        | 7497        | 2427                    | 5070                   | 108         | 13                     | 95                     | 0                       |
| MC – EC          | 327         | 142                     | 185                    | 131         | 47                     | 84                     | 0                       |
| CCC – HGSC       | 32171       | 22895                   | 9276                   | 560         | 488                    | 72                     | 31                      |
| EC – HGSC        | 7497        | 5070                    | 2427                   | 108         | 95                     | 13                     | 31                      |
| MC – HGSC        | 38350       | 12200                   | 26150                  | 772         | 446                    | 326                    | 31                      |
| CCC – MC         | 18286       | 15113                   | 3173                   | 327         | 265                    | 62                     | 49                      |
| EC – MC          | 327         | 185                     | 142                    | 131         | 84                     | 47                     | 49                      |
| HGSC – MC        | 38350       | 26150                   | 12200                  | 772         | 326                    | 446                    | 49                      |

*DMP*: Differentially methylated probe, *DMR*: Differentially methylated region, *Hypermethylation*:  $\delta \beta > 0.2$ ,

*Hypomethylation*:  $\delta \beta < -0.2$ , *CCC*: Clear cell carcinoma, *EC*: Endometroid carcinoma, *HGSC*: High-grade serous carcinoma, *MC*: Mucinous carcinoma

**Figure 14** Differentially methylated probes for histotype comparisons

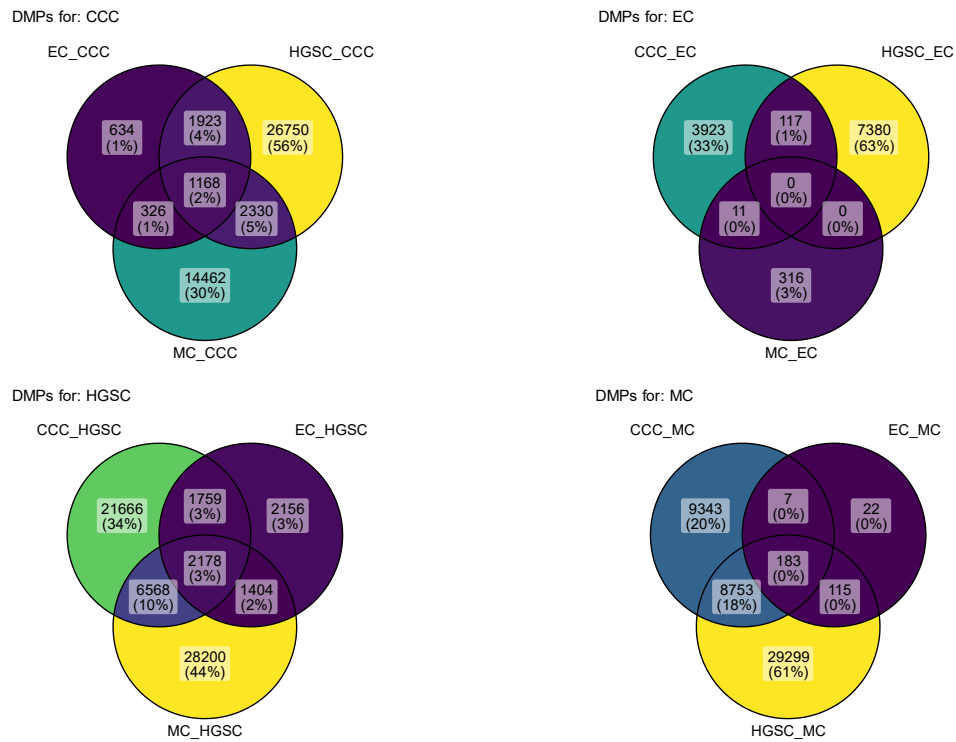

*DMP*: Differentially methylated probe, *CCC*: Clear cell carcinoma, *EC*: Endometroid carcinoma, *HGSC*: High-grade serous carcinoma, *MC*: Mucinous carcinoma. Created in r package “ggVennDiagram”

**Figure 15** Differentially methylated regions for histotype comparisons

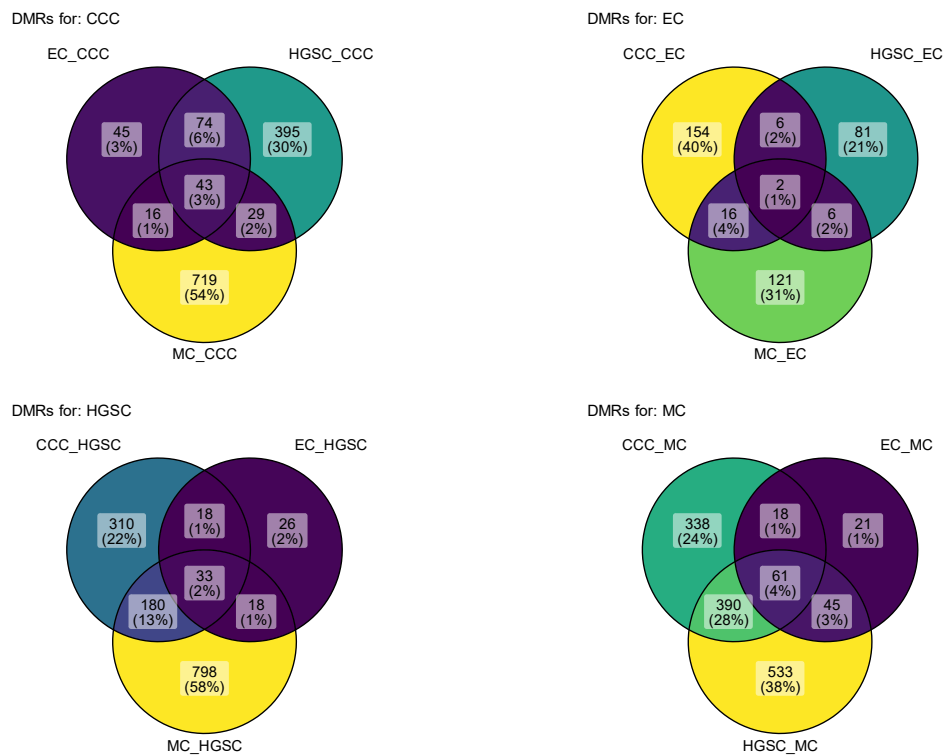

*DMR*: Differentially methylated region, *CCC*: Clear cell carcinoma, *EC*: Endometroid carcinoma, *HGSC*: High-grade serous carcinoma, *MC*: Mucinous carcinoma. Created in r package “ggVennDiagram”

**Figure 16** Location of DMPs and DMP-types for comparisons involving histotype CCC

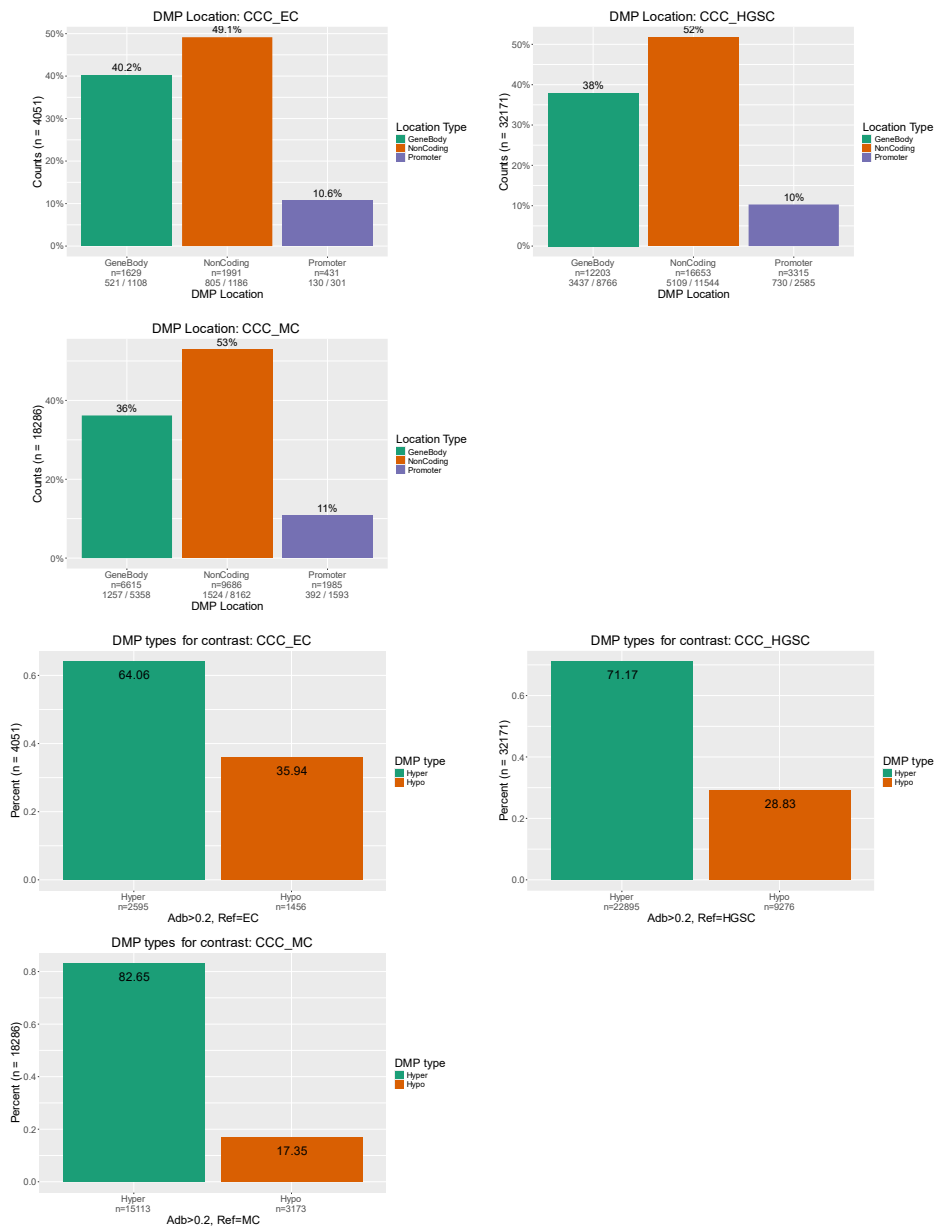

Upper Plots: DMP CpG site location on Hg38 genome for CCC. Numbers below location-type indicates total number of DMPs overlapping position (row 1) and Hypermethylated/Hypomethylated probes of the position-type (row 2). *Hyper*: Hypermethylated ( $\delta\beta > 0.2$ ), *Hypo*: Hypomethylated ( $\delta\beta < 0.2$ ), *Promoter*: 2000bp before TSS, 50bp after TSS. Lower plots: DMP methylation type for CCC, *Adb*: Absolute value of  $\delta\beta$ , *DMP*: Differentially methylated probe, *CCC*: Clear cell carcinoma, *EC*: Endometroid carcinoma, *HGSC*: High-grade serous carcinoma, *MC*: Mucinous carcinoma. Created in R-package “ggplot”

**Figure 17** Location of DMPs and DMP-types for comparisons involving histotype CCC

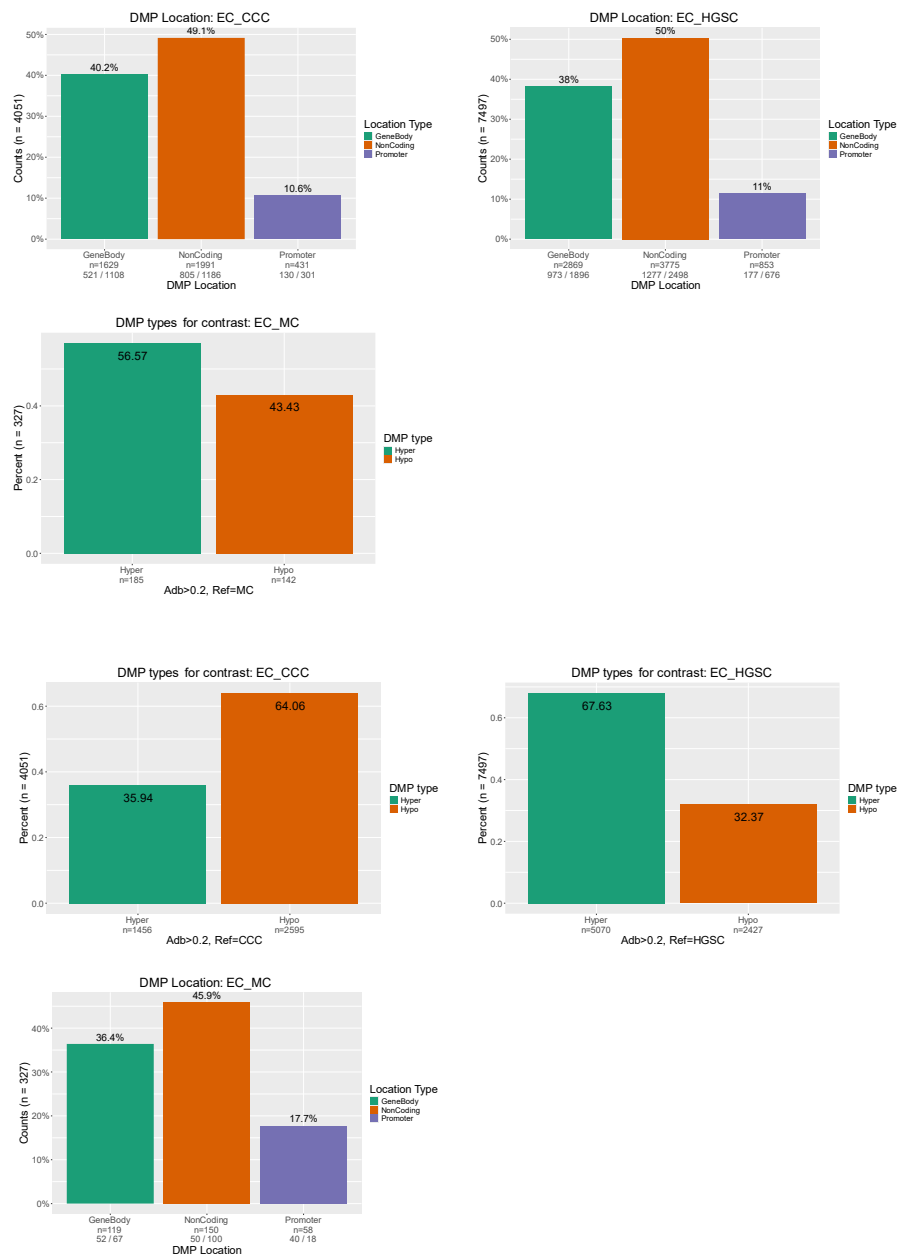

Upper Plots: Differentially methylated probes CpG site location on Hg38 genome for EC. Numbers below location-type indicates total number of DMPs overlapping position (row 1) and Hypermethylated/Hypomethylated probes of the position-type (row 2). *Hyper*: Hypermethylated ( $\delta\beta > 0.2$ ), *Hypo*: Hypomethylated ( $\delta\beta < 0.2$ ), *Promoter*: 2000bp before TSS, 50bp after TSS. Lower plots: DMP methylation type for CCC, *Adb*: Absolute value of  $\delta\beta$ , *DMP*: Differentially methylated probe, *CCC*: Clear cell carcinoma, *EC*: Endometroid carcinoma, *HGSC*: High-grade serous carcinoma, *MC*: Mucinous carcinoma. Created in R-package “ggplot”



**Figure 18** Location of DMPs and DMP-types for comparisons involving histotype HGSC

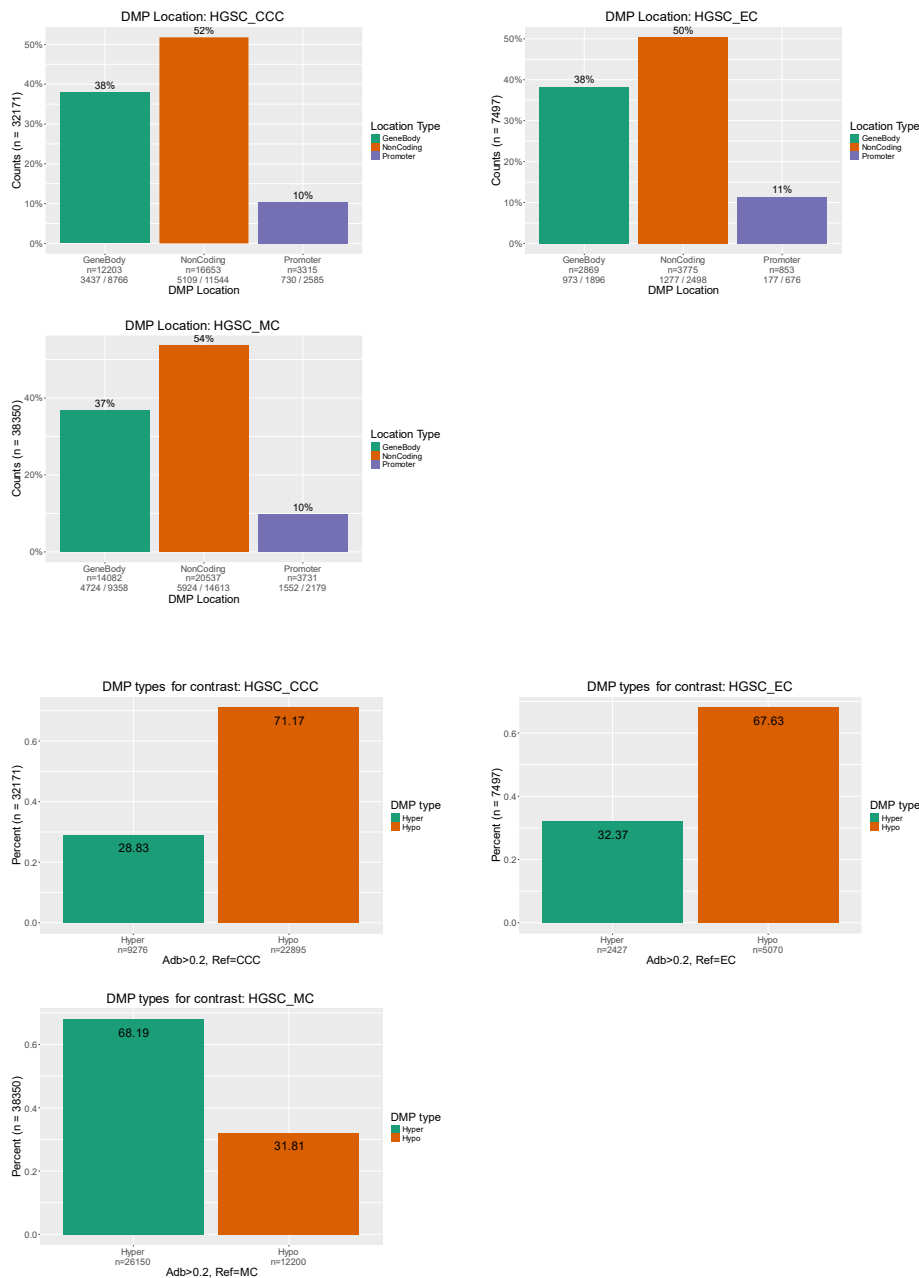

Upper Plots: Differentially methylated probes CpG site location on Hg38 genome for HGSC. Numbers below location-type indicates total number of DMPs overlapping position (row 1) and Hypermethylated/Hypomethylated probes of the position-type (row 2). *Hyper*: Hypermethylated ( $\delta\beta > 0.2$ ), *Hypo*: Hypomethylated ( $\delta\beta < 0.2$ ), *Promoter*: 2000bp before TSS, 50bp after TSS. Lower plots: DMP methylation type for CCC, *Adb*: Absolute value of  $\delta\beta$ , *DMP*: Differentially methylated probe, *CCC*: Clear cell carcinoma, *EC*: Endometroid carcinoma, *HGSC*: High-grade serous carcinoma, *MC*: Mucinous carcinoma. Created in R-package “ggplot”

**Figure 19** Location of DMPs and DMP-types for comparisons involving histotype MC

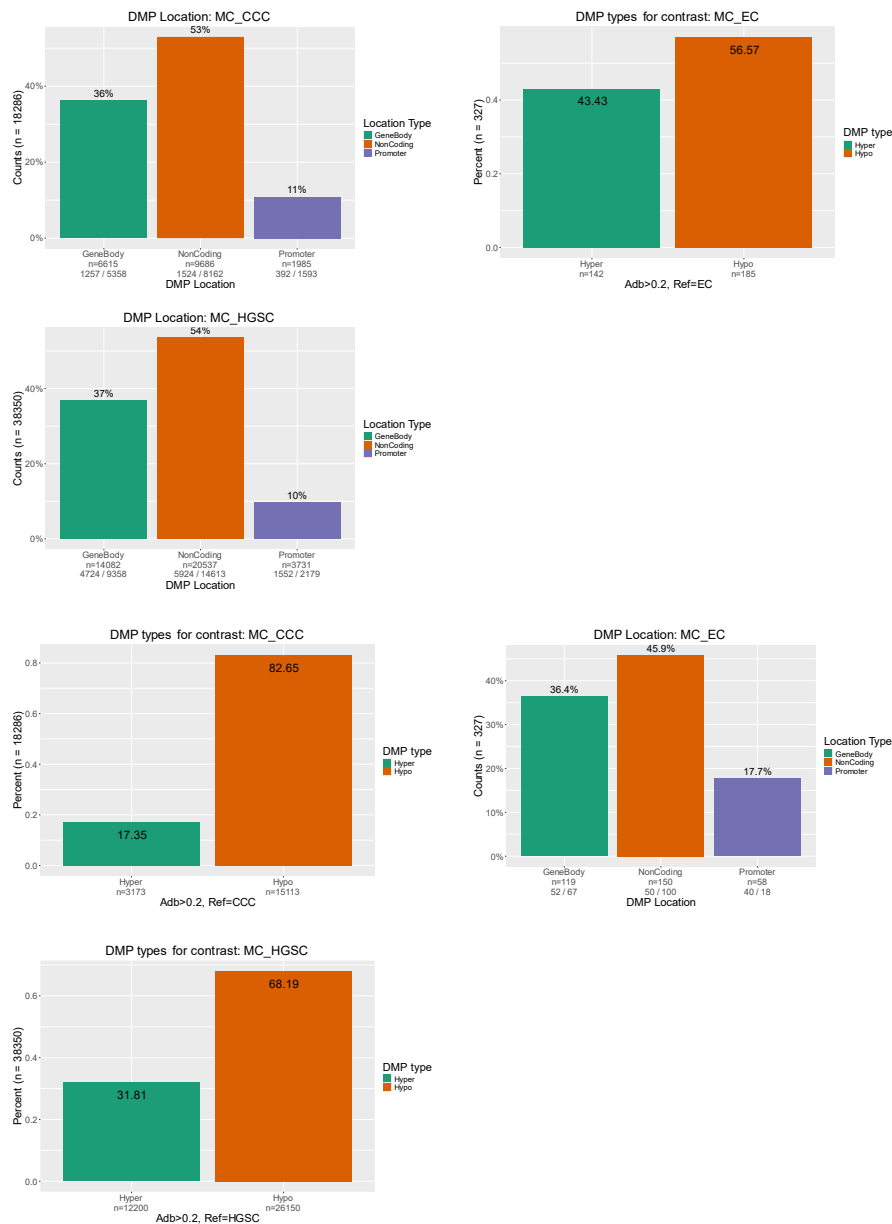

Upper Plots: Differentially methylated probes CpG site location on Hg38 genome for MC. Numbers below location-type indicates total number of DMPs overlapping position (row 1) and Hypermethylated/Hypomethylated probes of the position-type (row 2). *Hyper*: Hypermethylated ( $\delta\beta > 0.2$ ), *Hypo*: Hypomethylated ( $\delta\beta < 0.2$ ), *Promoter*: 2000bp before TSS, 50bp after TSS. Lower plots: DMP methylation type for CCC, *Adb*: Absolute value of  $\delta\beta$ , *DMP*: Differentially methylated probe, *CCC*: Clear cell carcinoma, *EC*: Endometroid carcinoma, *HGSC*: High-grade serous carcinoma, *MC*: Mucinous carcinoma. Created in R-package “ggplot”

**Figure 20** Percentage of samples for CCC showing CNA

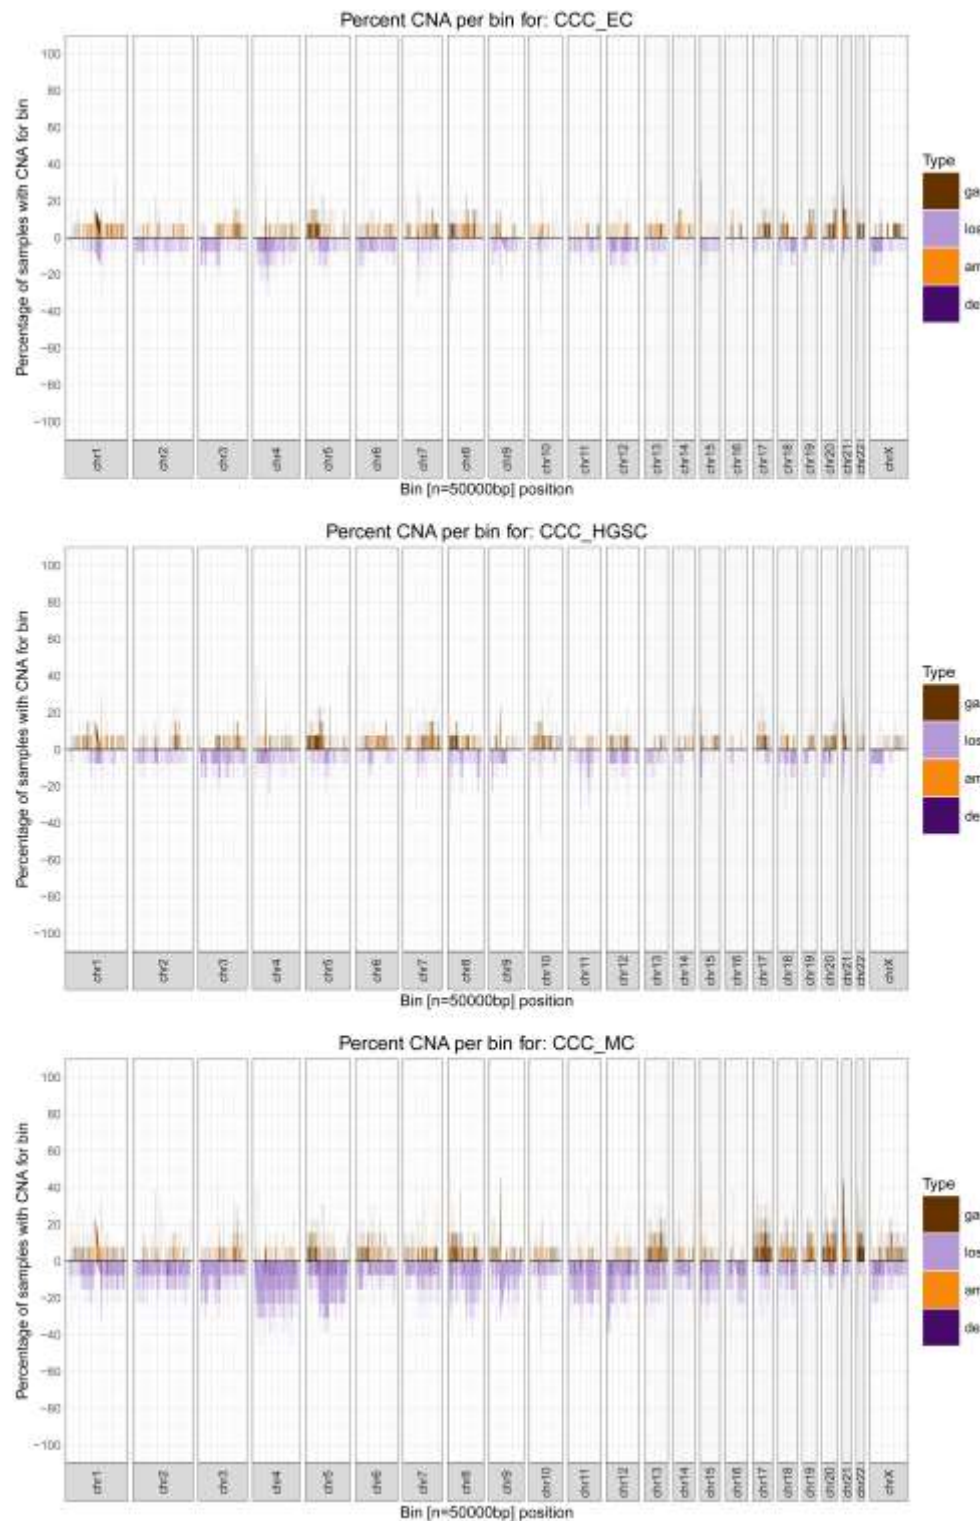

Bins: width=50000bp, CNA: Copy number aberrations, Gain: intensity>0.3, Amp: intensity > 0.5, Loss: intensity< -0.3, Del: intensity< -1, CCC: Clear cell carcinoma, EC: Endometrioid carcinoma, HGSC: High-grade serous carcinoma, MC: Mucinous carcinoma Created in R-package “ggplot”

**Figure 21** Percentage of samples for EC showing CNA

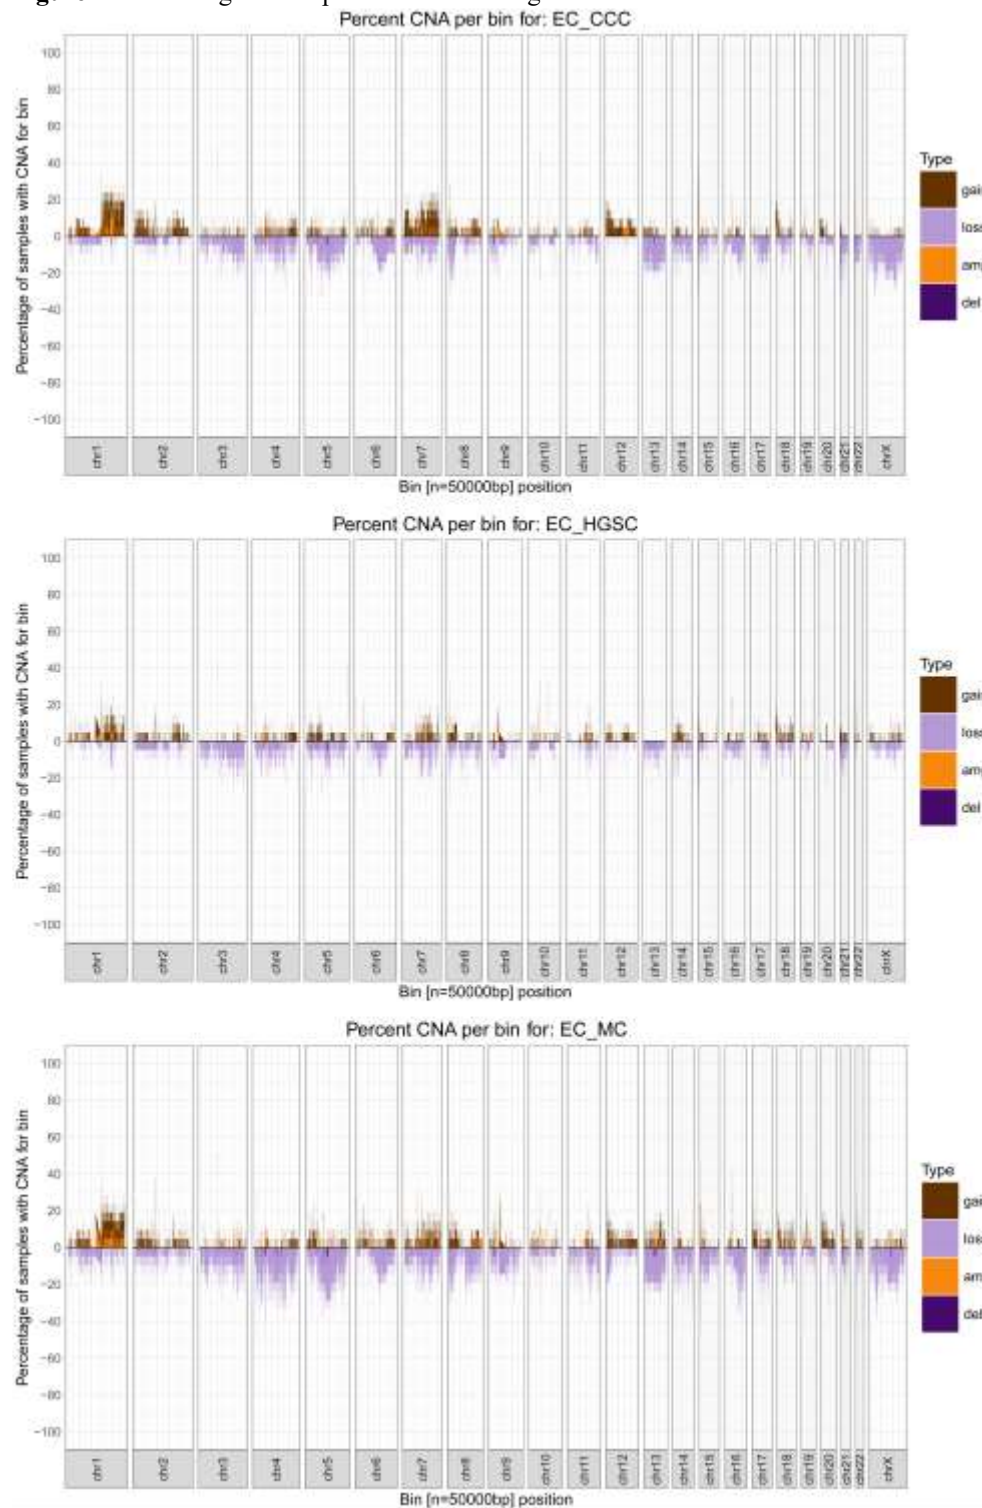

Bins: width=50000bp, CNA: Copy number aberrations, Gain: intensity>0.3, Amp: intensity > 0.5, Loss: intensity< -0.3, Del: intensity< -1, CCC: Clear cell carcinoma, EC: Endometroid carcinoma, HGSC: High-grade serous carcinoma, MC: Mucinous carcinoma Created in R-package “ggplot”

**Figure 22** Percentage of samples for HGSC showing CNA

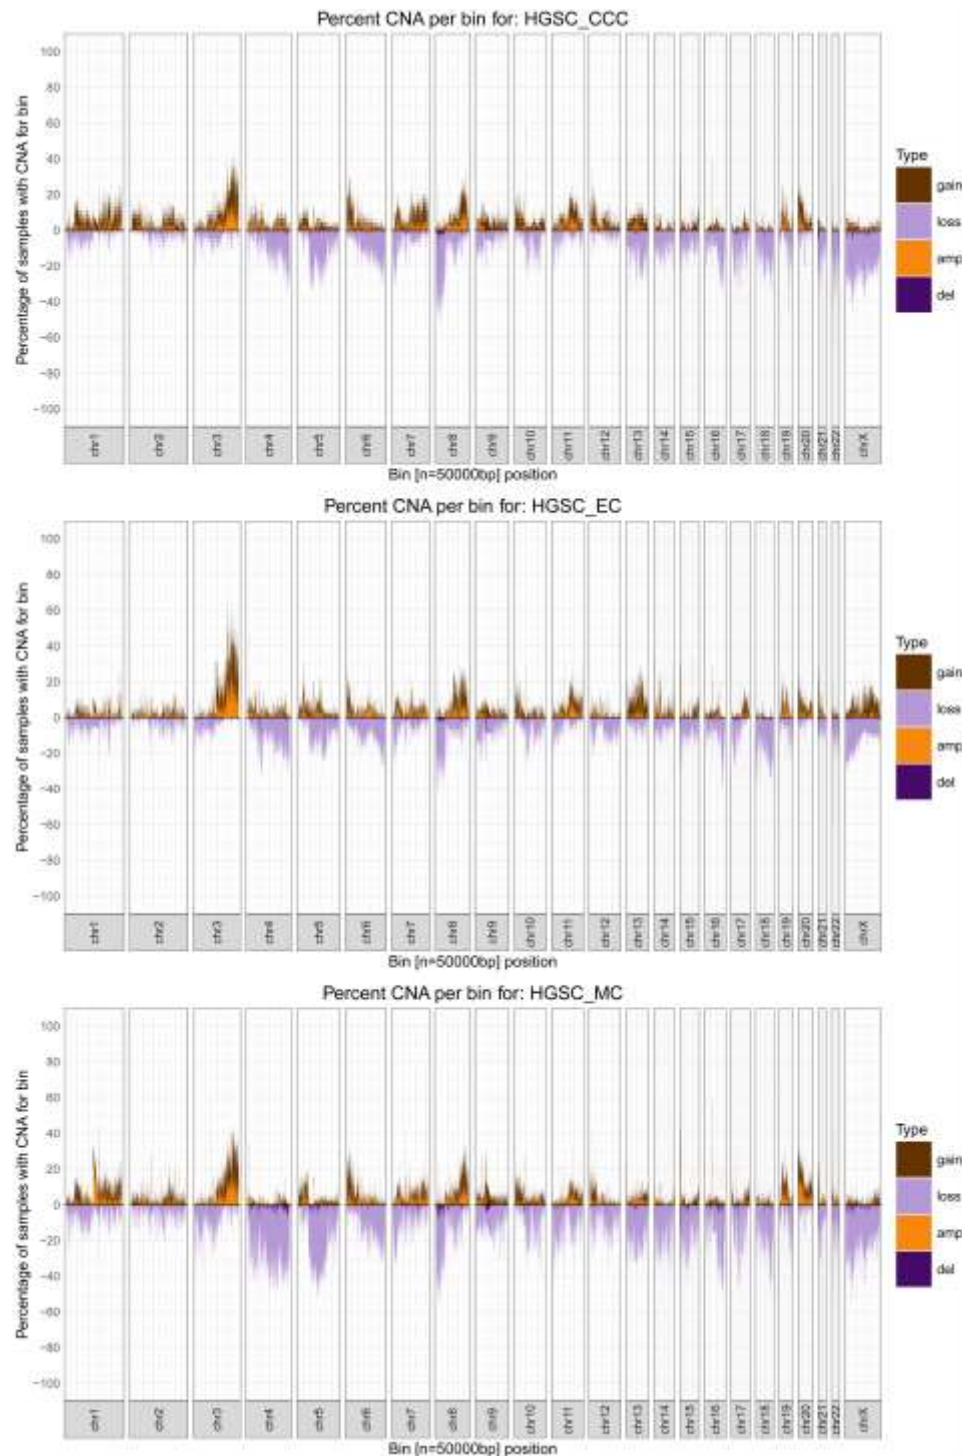

Bins: width=50000bp, CNA: Copy number aberrations, Gain: intensity>0.3, Amp: intensity > 0.5, Loss: intensity< -0.3, Del: intensity< -1, CCC: Clear cell carcinoma, EC: Endometroid carcinoma, HGSC: High-grade serous carcinoma, MC: Mucinous carcinoma Created in R-package “ggplot”

**Figure 23** Percentage of samples for MC showing CNA

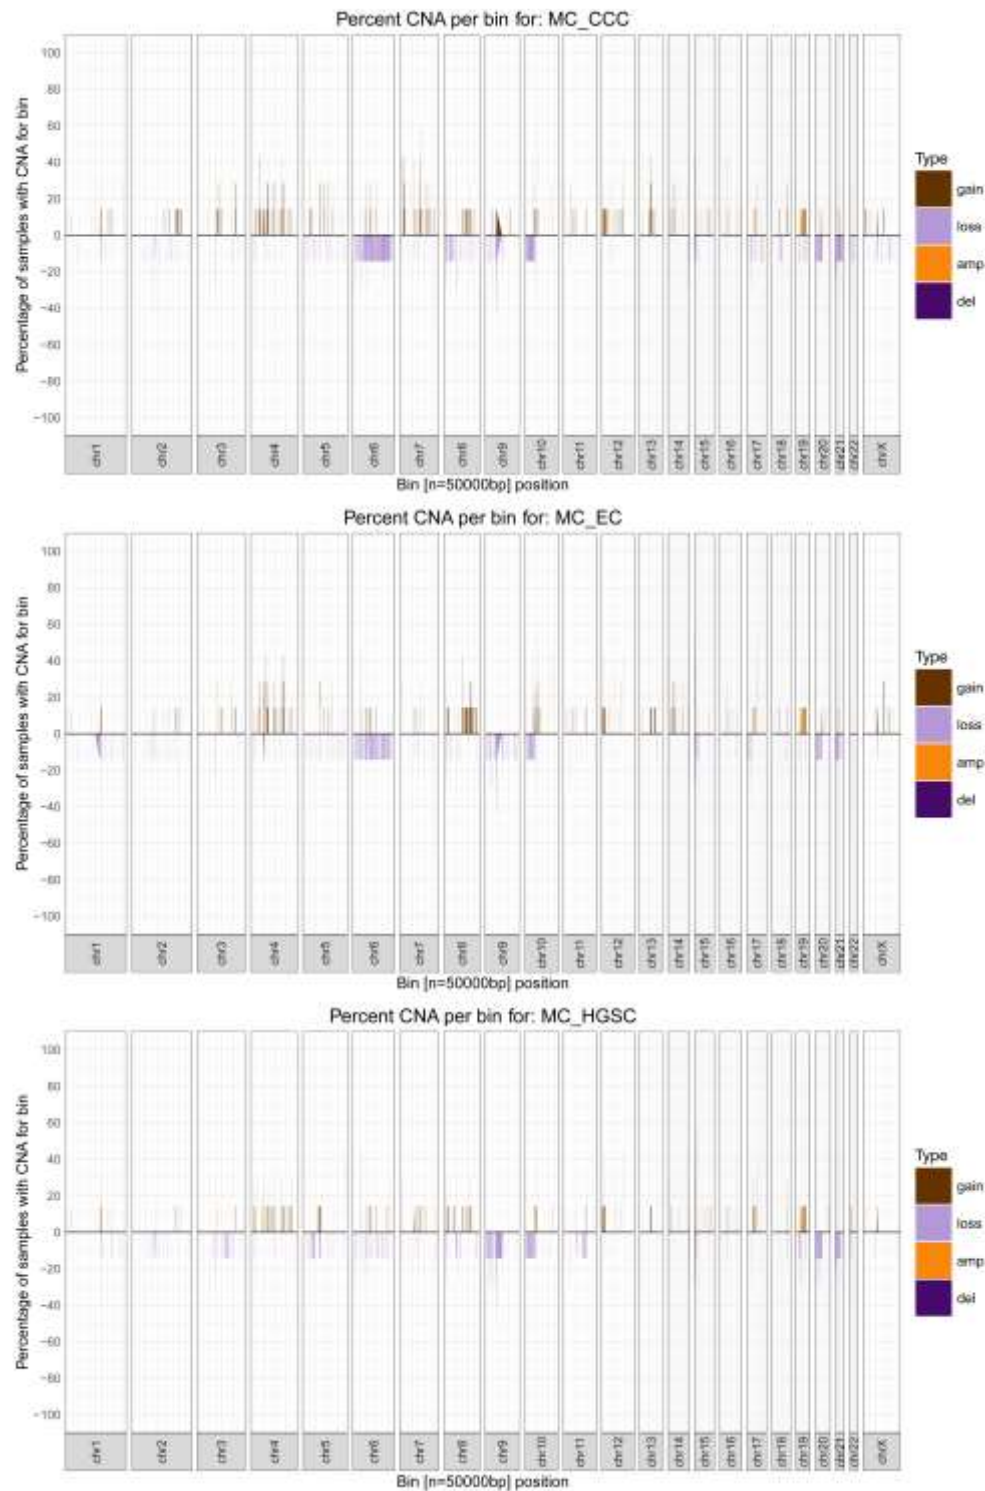

Bins: width=50000bp, CNA: Copy number aberrations, Gain: intensity>0.3, Amp: intensity > 0.5, Loss: intensity< -0.3, Del: intensity< -1, CCC: Clear cell carcinoma, EC: Endometroid carcinoma, HGSC: High-grade serous carcinoma, MC: Mucinous carcinoma Created in R-package “ggplot”

**Table 18** The number of significant GISTIC lesions and regions in the training cohort

| <b>Contrast</b> | <b>Significant lesions</b> | <b>Gain</b> | <b>Loss</b> | <b>Significant regions</b> | <b>Gain</b> | <b>Loss</b> |
|-----------------|----------------------------|-------------|-------------|----------------------------|-------------|-------------|
| CCC – EC        | 0                          | 0           | 0           | 0                          | 0           | 0           |
| CCC – HGSC      | 2                          | 2           | 0           | 0                          | 0           | 0           |
| CCC – MC        | 3                          | 1           | 2           | 38                         | 38          | 0           |
| EC – CCC        | 3                          | 2           | 1           | 15                         | 15          | 0           |
| EC – HGSC       | 4                          | 3           | 1           | 3                          | 3           | 0           |
| EC – MC         | 11                         | 8           | 3           | 20                         | 19          | 1           |
| HGSC – CCC      | 30                         | 23          | 7           | 180                        | 44          | 126         |
| HGSC – EC       | 34                         | 16          | 18          | 125                        | 64          | 61          |
| HGSC – MC       | 41                         | 32          | 9           | 273                        | 71          | 202         |
| MC – CCC        | 2                          | 2           | 0           | 10                         | 2           | 8           |
| MC – EC         | 2                          | 2           | 0           | 60                         | 2           | 58          |
| MC – HGSC       | 4                          | 4           | 0           | 6                          | 4           | 2           |

*Significant lesions:*  $q.value < 0.05$ , *Significant regions:* frequency  $> 25\%$ ,  $fdr < 0.05$ , *CCC:* Clear cell carcinoma, *EC:* Endometroid carcinoma, *HGSC:* High-grade serous carcinoma, *MC:* Mucinous carcinoma

**Table 19** Differentially expressed genes present in GISTIC CNA region

| <b>Contrast</b> | <b>DEGs</b> | <b>Gistic<br/>region<br/>genes</b> | <b>DEGs<br/>within<br/>gistic<br/>regions</b> | <b>Gain –<br/>Upregulated</b> | <b>Loss –<br/>Downregulated</b> | <b>Gain-<br/>Downregulated,<br/>Loss -<br/>Upregulated</b> |
|-----------------|-------------|------------------------------------|-----------------------------------------------|-------------------------------|---------------------------------|------------------------------------------------------------|
| CCC – EC        | 0           | 0                                  | 0                                             | 0                             | 0                               | 0                                                          |
| CCC – HGSC      | 1309        | 27                                 | 1                                             | 0                             | 1                               | 0                                                          |
| CCC – MC        | 826         | 39                                 | 2                                             | 0                             | 0                               | 2                                                          |
| EC – CCC        | 733         | 29                                 | 0                                             | 0                             | 0                               | 0                                                          |
| EC – HGSC       | 119         | 68                                 | 0                                             | 0                             | 0                               | 0                                                          |
| EC – MC         | 162         | 311                                | 0                                             | 0                             | 0                               | 0                                                          |
| HGSC – CCC      | 1314        | 3216                               | 104                                           | 4                             | 61                              | 39                                                         |
| HGSC – EC       | 130         | 3882                               | 9                                             | 2                             | 6                               | 1                                                          |
| HGSC – MC       | 772         | 3253                               | 60                                            | 1                             | 41                              | 18                                                         |
| MC – CCC        | 797         | 29                                 | 0                                             | 0                             | 0                               | 0                                                          |
| MC – EC         | 148         | 17                                 | 0                                             | 0                             | 0                               | 0                                                          |
| MC – HGSC       | 745         | 1041                               | 14                                            | 0                             | 5                               | 4                                                          |

*DEG*: Differentially expressed gene, *Upregulated*:  $\log_2FC > 1$ , Benjamini-Hochberg  $< 0.05$ , *Downregulated*:  $\log_2FC < 1$ , Benjamini-Hochberg  $< 0.05$ , *CCC*: Clear cell carcinoma, *EC*: Endometroid carcinoma, *HGSC*: High-grade serous carcinoma, *MC*: Mucinous carcinoma



**Figure 24** GISTIC CNA analysis results for CCC

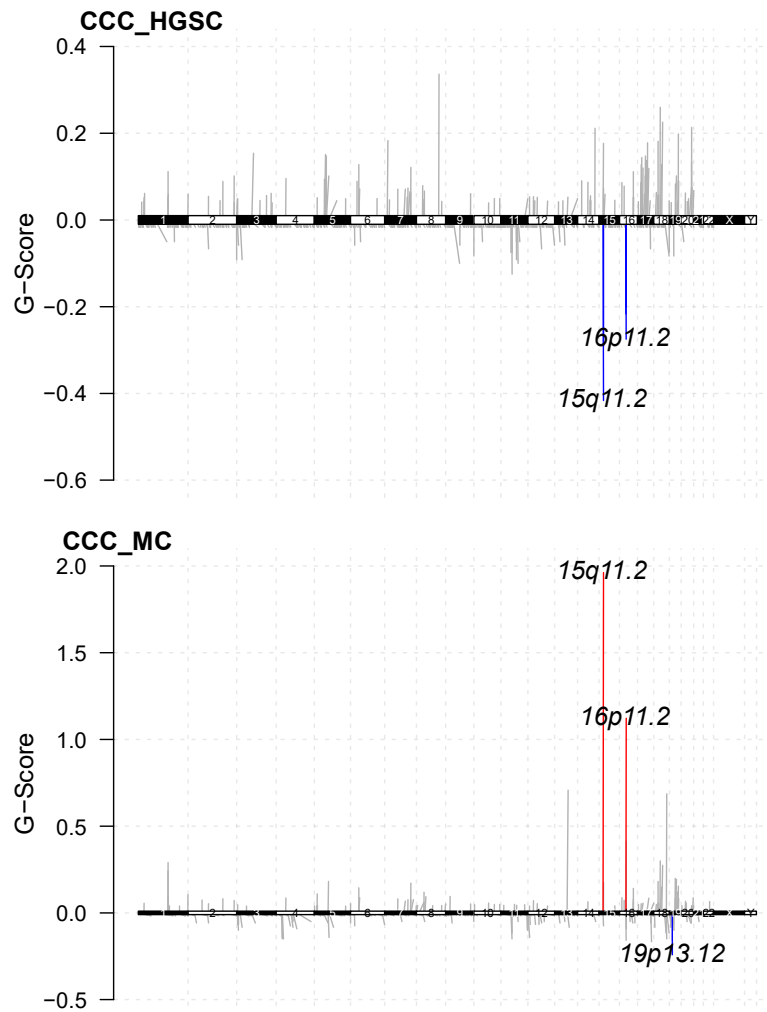

Red peaks represent CNA gains, blue peaks represent CNA losses. Cytoband name for plotted peak at end of peak. No losses or gains detected for the CCC – EC comparison. *G-score*: Score based on the aberration amplitude in relation to frequency of its occurrence across samples, used by GISTIC. CCC: Clear cell carcinoma, EC: Endometroid carcinoma, *HGSC*: High-grade serous carcinoma, *MC*: Mucinous carcinoma. Created in R-package “maftools”

**Figure 25** GISTIC CNA analysis results for EC

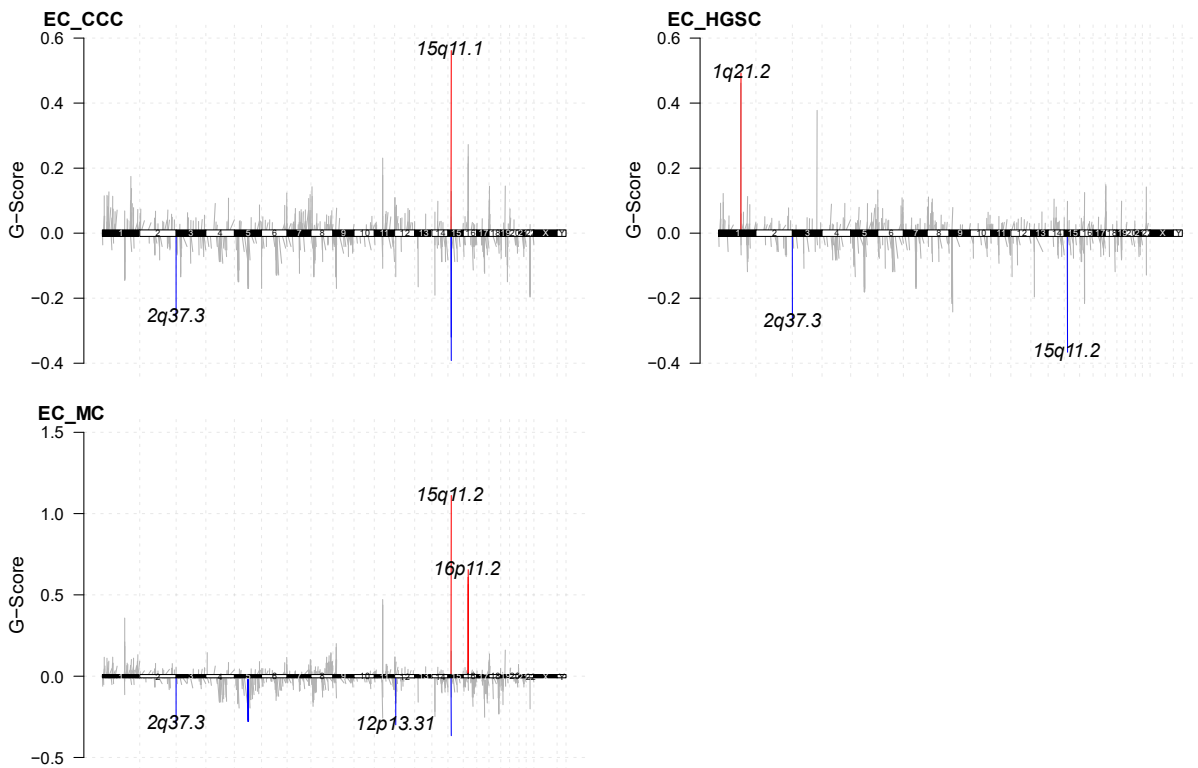

Red peaks represent CNA gains, blue peaks represent CNA losses. Cytoband name for plotted *peak* at end of peak. G-score: Score based on the aberration amplitude in relation to frequency of its occurrence across samples, used by GISTIC. CCC: Clear cell carcinoma, EC: Endometroid carcinoma, HGSC: High-grade serous carcinoma, MC: Mucinous carcinoma. Created in R-package “maftools”

**Figure 26** GISTIC CNA analysis results for HGSC

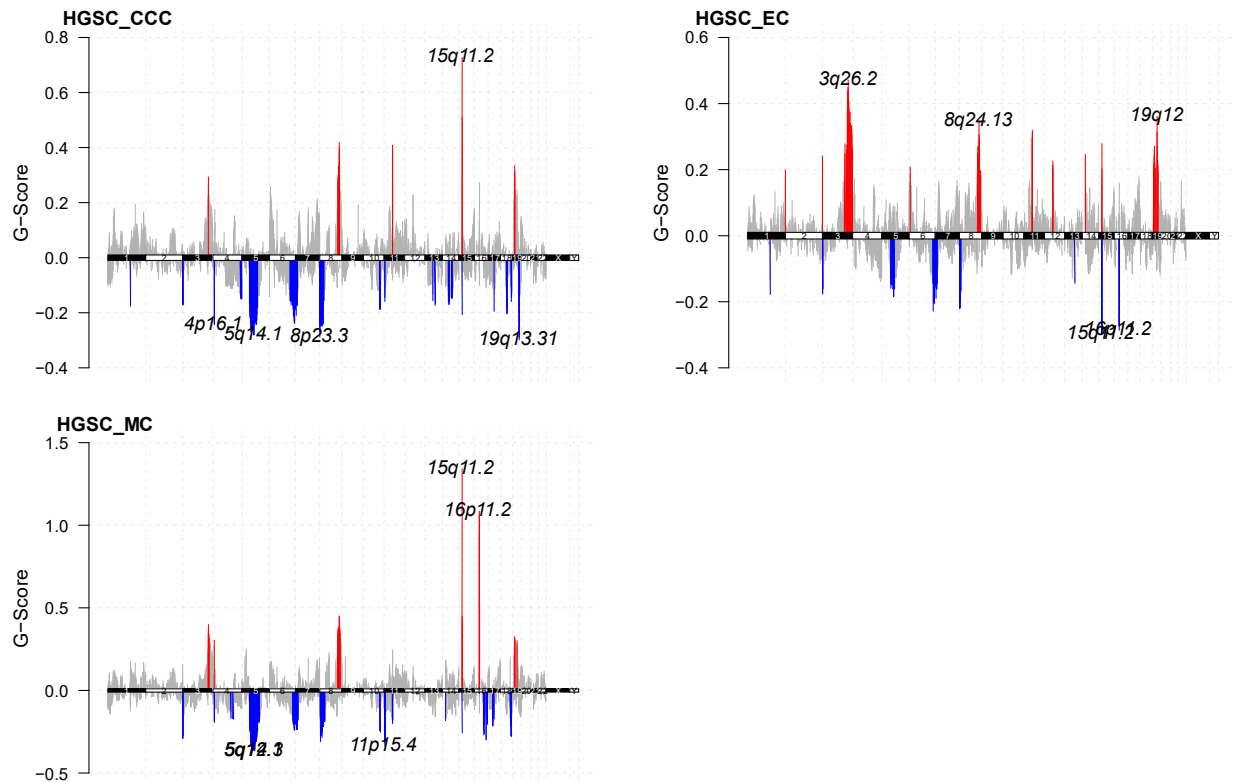

Red peaks represent CNA gains, blue peaks represent CNA losses. Cytoband name for plotted peak at end of peak. *G-score*: Score based on the aberration amplitude in relation to frequency of its occurrence across samples, used by GISTIC. *CCC*: Clear cell carcinoma, *EC*: Endometroid carcinoma, *HGSC*: High-grade serous carcinoma, *MC*: Mucinous carcinoma. Created in R-package “maftools”

**Figure 27** GISTIC CNA analysis results for MC

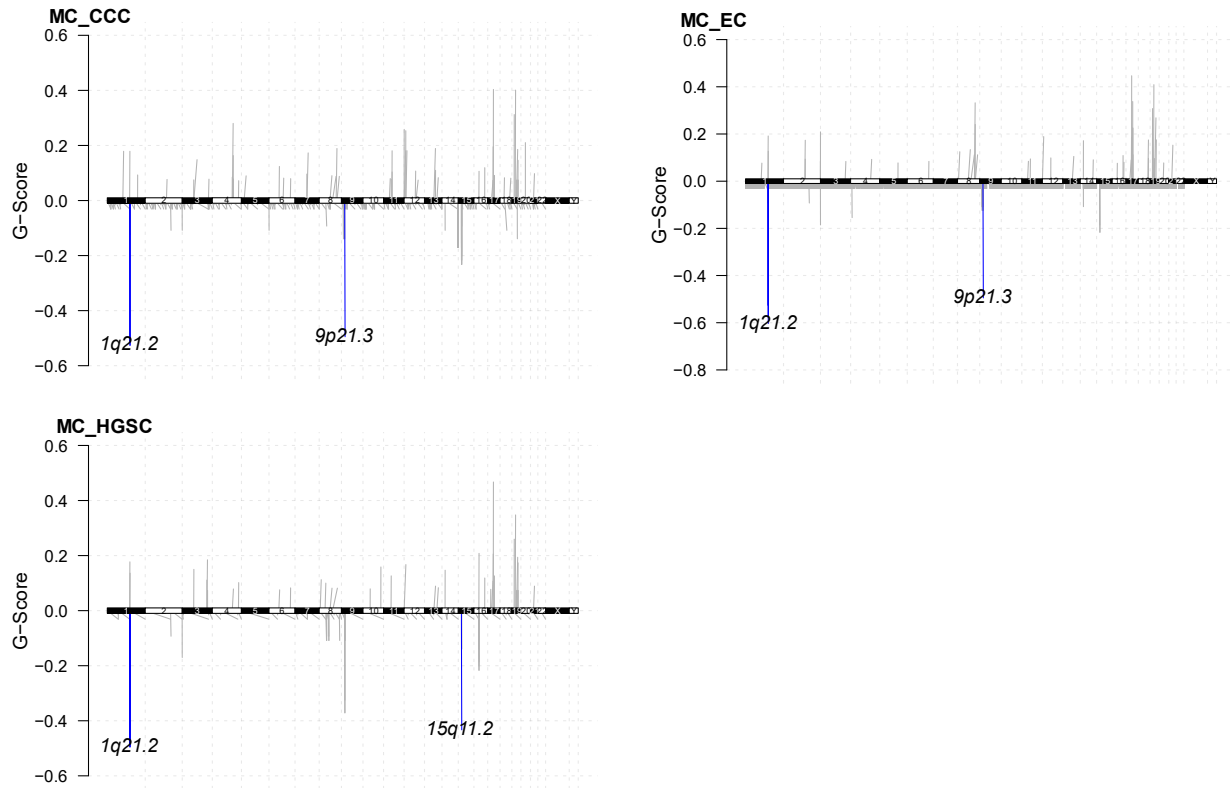

Red peaks represent CNA gains, blue peaks represent CNA losses. Cytoband name for plotted peak at end of peak. *G-score*: Score based on the aberration amplitude in relation to frequency of its occurrence across samples, used by GISTIC. CCC: Clear cell carcinoma, EC: Endometrioid carcinoma, HGSC: High-grade serous carcinoma, MC: Mucinous carcinoma. Created in R-package “maftools”

**Table 20** The number of HSGs found to overlap with a differentially methylated probe (DMPs) with respect to genomic position ((gene + promoter)/CpG-site)

| Comparison group | DMP-<br>HSG<br>body<br>overlaps<br>(%<br>DMP) | DMP<br>- HSG<br>body<br>hyper | DMP<br>-<br>HSG<br>body<br>hypo | DMP -<br>HSG<br>promoter<br>overlaps<br>(% DMP) | DMP -<br>HSG<br>promo<br>hyper | DMP -<br>HSG<br>promo<br>hypo | HSG<br>body -<br>DMP<br>overlaps<br>(% HSG) | HSG<br>Promoter -<br>DMP<br>overlaps<br>(% HSG) |
|------------------|-----------------------------------------------|-------------------------------|---------------------------------|-------------------------------------------------|--------------------------------|-------------------------------|---------------------------------------------|-------------------------------------------------|
| EC – CCC         | 18 (0.4)                                      | 10                            | 8                               | 7 (0.2)                                         | 6                              | 1                             | 18 (19.8)                                   | 6 (6.6)                                         |
| HGSC –<br>CCC    | 131 (0.2)                                     | 60                            | 71                              | 20 (0.1)                                        | 15                             | 5                             | 46 (45.1)                                   | 14 (13.7)                                       |
| MC – CCC         | 61 (0.3)                                      | 11                            | 50                              | 12 (0.1)                                        | 7                              | 5                             | 32 (36.4)                                   | 7 (8.0)                                         |
| CCC – EC         | 0 (0)                                         | 0                             | 0                               | 0 (0)                                           | 0                              | 0                             | 0 (0)                                       | 0 (0)                                           |
| HGSC – EC        | 0 (0)                                         | 0                             | 0                               | 0 (0)                                           | 0                              | 0                             | 0 (0)                                       | 0 (0)                                           |
| MC – EC          | 0 (0)                                         | 0                             | 0                               | 0 (0)                                           | 0                              | 0                             | 0 (0)                                       | 0 (0)                                           |
| CCC –<br>HGSC    | 2 (0.01)                                      | 0                             | 2                               | 2 (0.01)                                        | 1                              | 1                             | 3 (37.5)                                    | 2 (25.0)                                        |
| EC – HGSC        | 3 (0.04)                                      | 0                             | 3                               | 2 (0.03)                                        | 0                              | 2                             | 2 (25.0)                                    | 2 (25.0)                                        |
| MC – HGSC        | 9 (0.02)                                      | 1                             | 8                               | 2 (0.01)                                        | 1                              | 1                             | 6 (60.0)                                    | 2 (20.0)                                        |
| CCC – MC         | 55 (0.3)                                      | 7                             | 48                              | 18 (0.1)                                        | 0                              | 18                            | 31 (44.3)                                   | 11 (15.7)                                       |
| EC – MC          | 3 (0.0)                                       | 1                             | 2                               | 0 (0)                                           | 0                              | 0                             | 2 (4.3)                                     | 0 (0)                                           |
| HGSC – MC        | 74 (0.2)                                      | 13                            | 61                              | 27 (0.1)                                        | 5                              | 22                            | 37 (52.1)                                   | 17 (23.9)                                       |

*HSG*: Histotype specific gene (classified as significantly differentially expressed gene in 3/3 possible histotype comparisons for a histotype of interest used as reference in comparisons), *DEG*: Differentially expressed gene, *DMP*: Differentially methylated probe, *DMR*: Differentially methylated region, *Hypermethylation*:  $\delta \beta > 0.2$ , *Hypomethylation*:  $\delta \beta < -0.2$ , *CCC*: Clear cell carcinoma, *EC*: Endometroid carcinoma, *HGSC*: High-grade serous carcinoma, *MC*: Mucinous carcinoma

**Table 21** Genomic coordinate overlaps between differentially methylated regions and differentially expressed genes

| <b>Contrast</b> | <b>DMRs</b> | <b>DMR-DEG overlaps<br/>(%DMR)</b> | <b>DMR-HSG overlaps<br/>(%DMR)</b> |
|-----------------|-------------|------------------------------------|------------------------------------|
| CCC – EC        | 180         | 13 (7.2)                           | 0                                  |
| CCC – HGSC      | 560         | 55 (9.8)                           | 1 (0.2)                            |
| CCC – MC        | 327         | 57 (17.4)                          | 12 (3.7)                           |
| EC – CCC        | 180         | 13 (7.2)                           | 1 (0.6)                            |
| EC – HGSC       | 108         | 1 (0.9)                            | 0                                  |
| EC – MC         | 131         | 11 (8.4)                           | 10 (7.6)                           |
| HGSC – CCC      | 560         | 55 (9.8)                           | 7 (1.3)                            |
| HGSC – EC       | 108         | 1 (0.9)                            | 0                                  |
| HGSC – MC       | 772         | 55 (7.1)                           | 13 (1.7)                           |
| MC – CCC        | 327         | 59 (18.0)                          | 3 (0.9)                            |
| MC – EC         | 131         | 10 (7.6)                           | 0                                  |
| MC – HGSC       | 772         | 54 (7.0)                           | 1 (0.1)                            |

*HSG*: Histotype specific gene (classified as significantly differentially expressed gene in 3/3 possible histotype comparisons for a histotype of interest used as reference in comparisons), *DMR*: Differentially methylated region, *Hypermethylation*:  $\delta \beta > 0.2$ , *Hypomethylation*:  $\delta \beta < -0.2$ , *CCC*: Clear cell carcinoma, *EC*: Endometroid carcinoma, *HGSC*: High-grade serous carcinoma, *MC*: Mucinous carcinoma

**Table 22** HSGs with expression significantly correlated with gene-level CpG-site DNA-methylation.

| <b>Name</b> | <b>Total HSGs</b> | <b>HSGs significantly correlated with promoter methylation (% HSG)</b> | <b>Significant positively correlated promoter methylation</b> | <b>Significant negatively correlated promoter methylation</b> | <b>HSGs significantly correlated with gene-body methylation (% HSG)</b> | <b>Significant positively correlated gene-body methylation</b> | <b>Significant negatively correlated gene-body methylation</b> |
|-------------|-------------------|------------------------------------------------------------------------|---------------------------------------------------------------|---------------------------------------------------------------|-------------------------------------------------------------------------|----------------------------------------------------------------|----------------------------------------------------------------|
| CCC         | 167               | 20 (12.0)                                                              | 2                                                             | 18                                                            | 41 (24.6)                                                               | 18                                                             | 32                                                             |
| EC          | 0                 | 0                                                                      | 0                                                             | 0                                                             | 0                                                                       | 0                                                              | 0                                                              |
| HGSC        | 20                | 3 (15.0)                                                               | 0                                                             | 3                                                             | 7 (35.0)                                                                | 7                                                              | 0                                                              |
| MC          | 96                | 14 (15.6)                                                              | 1                                                             | 14                                                            | 35 (36.5)                                                               | 21                                                             | 18                                                             |

Numbers indicate no. genes with CpG site methylation significantly negatively or positively correlated with gene expression (absolute Pearssons correlation coefficient  $> 0.5$ , FDR  $< 0.05$ ) for either gene-promoter or gene-body region. *HSG*: Histotype specific gene (classified as significantly differentially expressed gene in 3/3 possible histotype comparisons for a histotype of interest used as reference in comparisons), *HSG*: Histotype specific gene (classified as significantly differentially expressed gene in 3/3 possible histotype comparisons for a histotype of interest used as reference in comparisons), *CCC*: Clear cell carcinoma, *EC*: Endometroid carcinoma, *HGSC*: High-grade serous carcinoma, *MC*: Mucinous carcinoma

**Figure 28** Pearson correlation coefficient plot for CpG sites overlapping HSGs for CCC

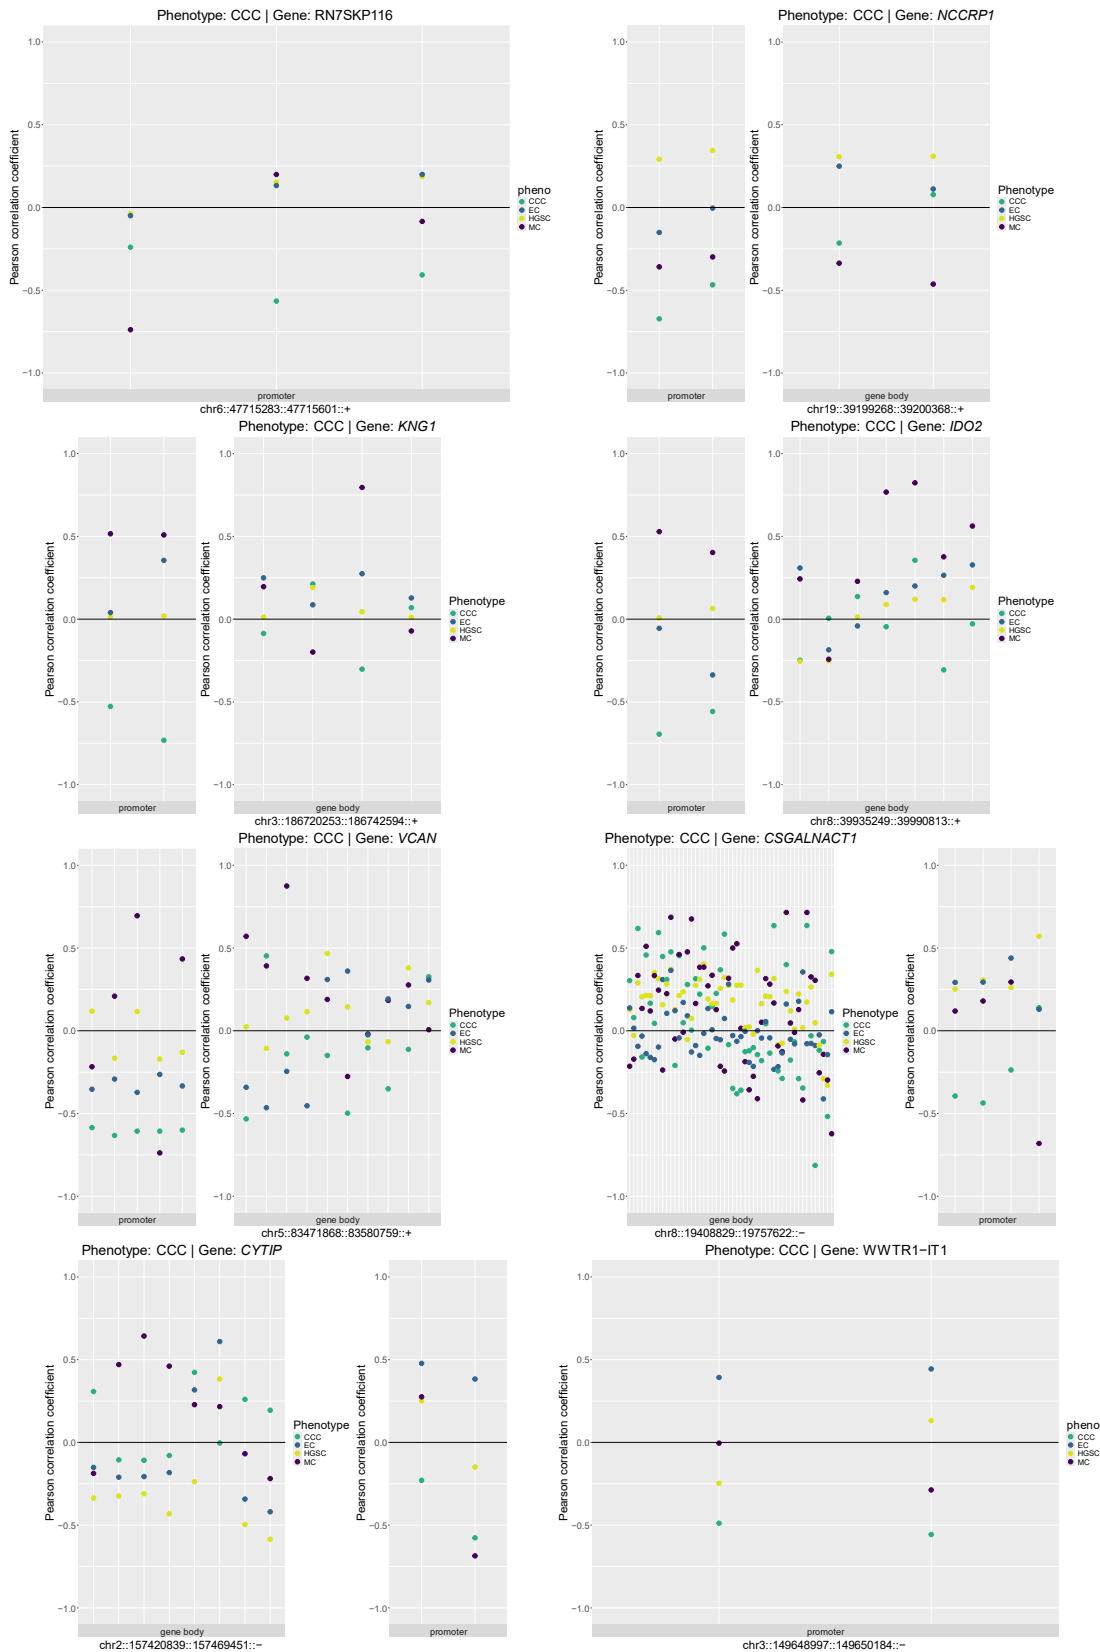



Top 8 HSGs (based on median distance between correlation coefficients for CpG sites in promoter region) for CCC. Dots show Pearson correlation coefficient for *CpG-site* DNA-methylation ( $\beta$ ) in relation to gene expression (log2 normalized counts) for samples belonging to a histotype. HSGs depicted have at least one CpG site significantly negatively correlated (*spearman correlation coefficient*  $< -0.5$ , *adjusted p*  $< 0.05$ ) with expression in the promoter region (2000bp before TSS, 50bp after TSS). *HSG*: Histotype specific gene (classified as significantly differentially expressed gene in 3/3 possible histotype comparisons for a histotype of interest used as reference in comparisons), *CCC*: Clear cell carcinoma, *EC*: Endometroid carcinoma, *HGSC*: High-grade serous carcinoma, *MC*: Mucinous carcinoma

**Figure 29** Pearson correlation coefficient plot for CpG sites overlapping HSGs for MC

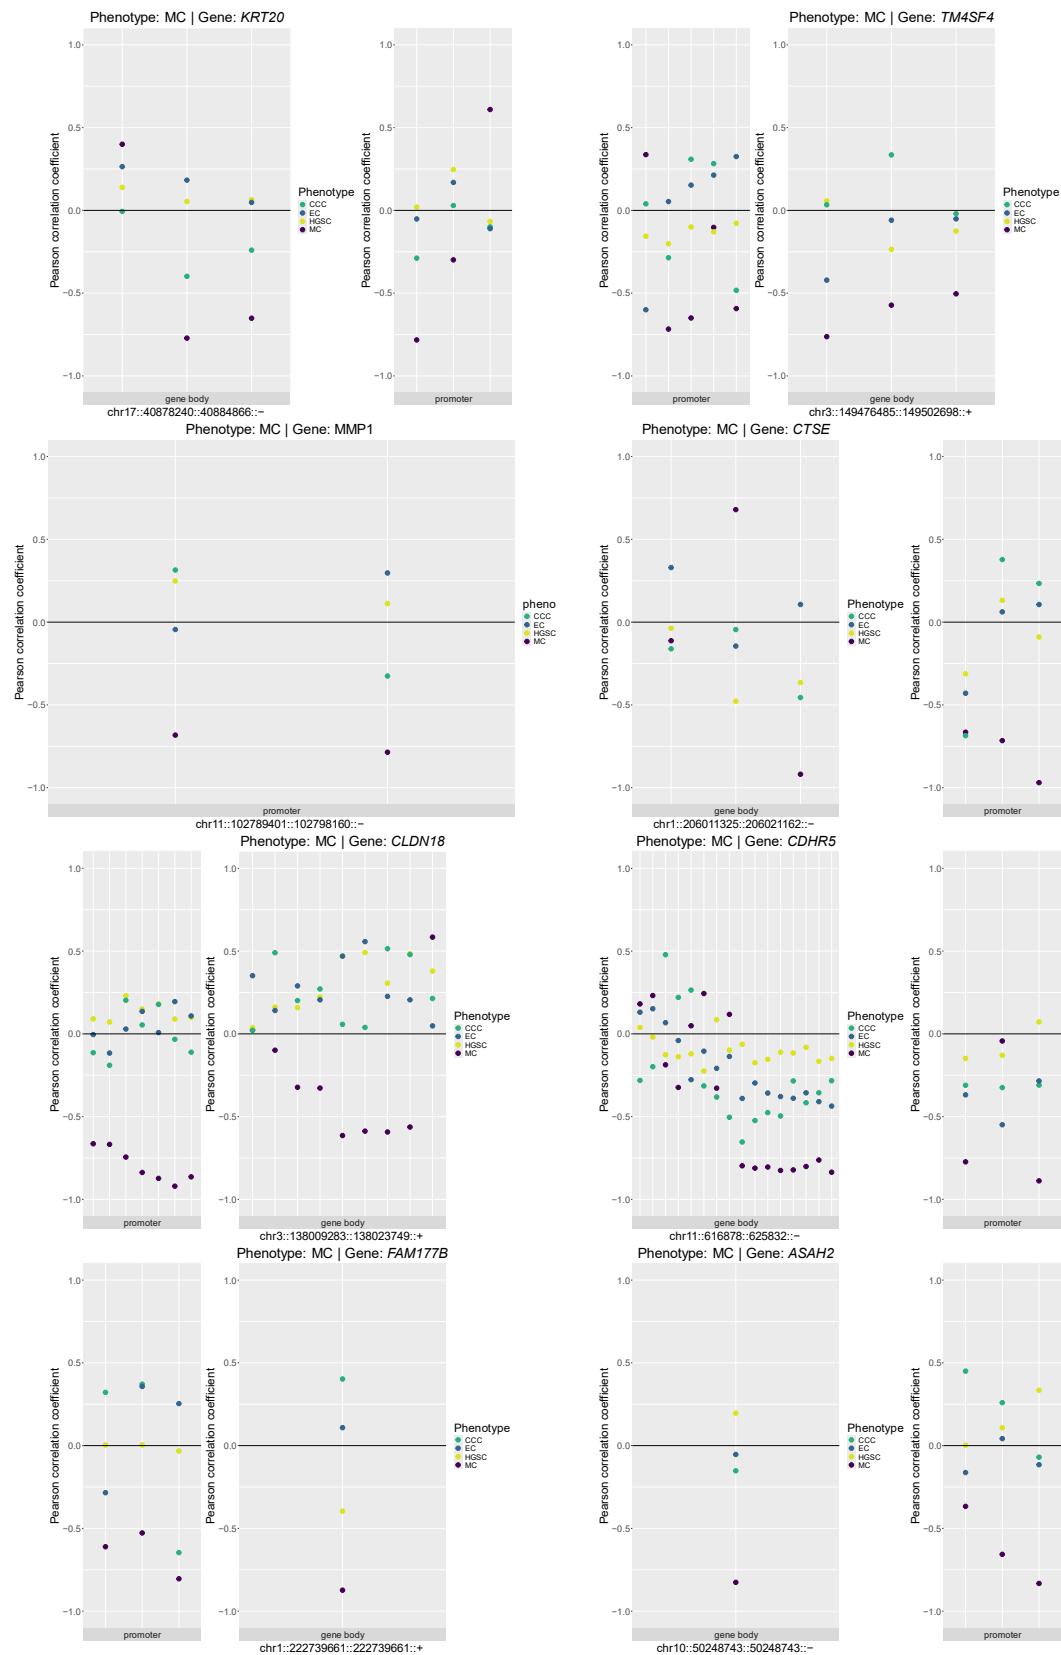

Top 8 HSGs (based on median distance between correlation coefficients for CpG sites in promoter region) for MC. Dots show Pearson correlation coefficient for *CpG-site* DNA-methylation ( $\beta$ ) in relation to gene expression (log2 normalized counts) for samples belonging to a histotype. HSGs depicted have at least one CpG site significantly negatively correlated (*spearman correlation coefficient*  $< -0.5$ , *adjusted p*  $< 0.05$ ) with expression in the promoter region (2000bp before TSS, 50bp after TSS). *HSG*: Histotype specific gene (classified as significantly differentially expressed gene in 3/3 possible histotype comparisons for a histotype of interest used as reference in comparisons), *CCC*: Clear cell carcinoma, *EC*: Endometroid carcinoma, *HGSC*: High-grade serous carcinoma, *MC*: Mucinous carcinoma
